# Supplementary material for: Remodeling of the Tumor Microenvironment Through PAK4 Inhibition Sensitizes Tumors to Immune Checkpoint Blockade
Source: Cancer Res Commun. 2022 Oct 19;2(10):1214–28. doi: 10.1158/2767-9764.CRC-21-0133 (PMC9799984; doi:10.1158/2767-9764.CRC-21-0133)
Supplement: Supplementary Table 5 — Supplemental Table 5: Differential gene expression analysis between B16 PAK4 KO anti-PD-1 vs WT anti-PD-1 tumors in vivo at day 10. Showing genes with q < 0.05 and log2FC > 1 or < -1. [file crc-21-0133-s15.xlsx]

## Sheet: DGE_invivo_day10KOPD_WTPD
Supplemental table 5: Differential gene expression analysis between B16 PAK4 KO anti-PD-1 vs WT anti-PD-1 tumors in vivo at day 10. Showing genes with q < 0.05 and log2FC > 1 or < -1
Gene	baseMean	log2FoldChange	lfcSE	stat	pvalue	padj
Hoxa11	86.9336	-5.98408	0.56282	-10.6323	2.10783e-26	3.20264e-22
Slc6a17	4852.88	2.20974	0.243485	9.07548	1.13174e-19	8.59784e-16
Hoxa11os	105.106	-4.02447	0.489446	-8.22252	1.99275e-16	1.00926e-12
Enpep	513.229	2.86881	0.351888	8.15262	3.56132e-16	1.35277e-12
Tmsb10	49820.4	-2.14448	0.276647	-7.75168	9.06815e-15	2.75563e-11
Fam81a	223.959	2.43483	0.316073	7.70338	1.32514e-14	3.35569e-11
Uchl1	405.901	-2.15627	0.28322	-7.61341	2.66965e-14	5.79467e-11
Gm9844	14100.6	-2.08981	0.278029	-7.51652	5.62535e-14	1.06839e-10
Gm34425	159.266	-3.57664	0.516167	-6.92923	4.23144e-12	7.14361e-09
Gon4l	166.202	2.8661	0.417269	6.86871	6.47871e-12	9.84375e-09
Pak3	56.2807	4.19888	0.61754	6.79936	1.05085e-11	1.45151e-08
Fasn	2668.01	3.02029	0.461215	6.54854	5.81021e-11	6.86442e-08
Sipa1l3	375.105	3.33906	0.510019	6.54693	5.8732e-11	6.86442e-08
Piezo1	490.861	3.5155	0.546308	6.43502	1.23455e-10	1.33984e-07
Ddx25	315.257	-1.60345	0.250758	-6.39442	1.61157e-10	1.63241e-07
Zswim5	72.69	3.62001	0.569577	6.35562	2.07593e-10	1.97135e-07
Zdhhc23	153.78	2.08563	0.330244	6.31542	2.69435e-10	2.27905e-07
Sh3pxd2a	462.712	2.59096	0.41028	6.3151	2.69994e-10	2.27905e-07
Kif26b	41.3675	4.60967	0.731975	6.29758	3.02326e-10	2.41765e-07
Megf8	587.762	2.96876	0.472768	6.27953	3.3959e-10	2.57987e-07
Gm3788	122.686	-1.86101	0.296931	-6.2675	3.66895e-10	2.65458e-07
Ankrd52	313.336	3.49831	0.564016	6.2025	5.55741e-10	3.65959e-07
Gfap	304.128	-1.81241	0.292212	-6.20237	5.56177e-10	3.65959e-07
Cck	1374.48	-2.51427	0.40577	-6.1963	5.78058e-10	3.65959e-07
Mmp15	57.6619	2.97149	0.482395	6.15987	7.28042e-10	4.42475e-07
Lrrc15	63.7391	3.07309	0.500493	6.14014	8.24495e-10	4.81822e-07
Sdk1	97.8813	3.47851	0.570437	6.09798	1.0742e-09	6.04498e-07
Ints1	595.023	2.95221	0.485593	6.0796	1.2048e-09	6.53778e-07
Mpdz	195.744	3.19557	0.5271	6.06255	1.33978e-09	7.01952e-07
Abca7	254.951	2.59185	0.43241	5.99397	2.0478e-09	1.00369e-06
Prr12	279.39	3.46704	0.578077	5.99754	2.00328e-09	1.00369e-06
Nrp2	2267.6	2.3736	0.397146	5.97665	2.27776e-09	1.08151e-06
Col4a1	1235.37	3.20273	0.539533	5.93612	2.91838e-09	1.34369e-06
Ubap2	649.425	2.80627	0.475417	5.90277	3.5745e-09	1.59738e-06
Col6a2	489.159	2.80764	0.477196	5.88362	4.01388e-09	1.6843e-06
Cdk5rap2	1182.69	2.16235	0.367345	5.88644	3.94596e-09	1.6843e-06
Pcnx3	369.051	2.91403	0.495579	5.88004	4.10155e-09	1.6843e-06
Col4a2	861.634	3.30488	0.562732	5.87292	4.28193e-09	1.7121e-06
Prrc2a	3312.52	2.83967	0.484412	5.8621	4.57056e-09	1.78064e-06
Sec16a	442.089	2.67066	0.456755	5.84704	5.00391e-09	1.81022e-06
Rere	544.376	2.35091	0.40167	5.85283	4.83264e-09	1.81022e-06
Zfp462	96.061	3.64591	0.623533	5.84717	4.99998e-09	1.81022e-06
Prrc2b	961.78	3.0091	0.516305	5.82815	5.60462e-09	1.98038e-06
Col5a1	368.782	3.57889	0.615499	5.81461	6.07748e-09	2.09866e-06
Col5a3	270.803	3.14426	0.543302	5.7873	7.15255e-09	2.41502e-06
Tmem131	602.122	2.73684	0.474685	5.76558	8.1376e-09	2.57589e-06
Spen	319.684	3.54817	0.615008	5.76931	7.95952e-09	2.57589e-06
Zfp646	219.099	1.78698	0.309841	5.76741	8.05013e-09	2.57589e-06
Huwe1	586.786	2.72556	0.474134	5.74851	9.00344e-09	2.7918e-06
Ppargc1a	2431.97	2.05524	0.358189	5.73787	9.58743e-09	2.91343e-06
Ets2	303.154	1.80318	0.314576	5.73211	9.91893e-09	2.95506e-06
Dlg5	113.152	3.01318	0.52678	5.72001	1.06518e-08	3.05365e-06
Abca2	371.541	3.00561	0.525216	5.72262	1.04894e-08	3.05365e-06
Ncor2	288.799	3.32016	0.581208	5.71252	1.11319e-08	3.13217e-06
Adh7	54.771	-2.56278	0.449422	-5.70239	1.18142e-08	3.26374e-06
Tln2	287.268	2.25811	0.39653	5.69467	1.23612e-08	3.35385e-06
Polr2a	748.893	3.28931	0.57838	5.68711	1.29209e-08	3.44422e-06
Rapgef2	1481.26	2.72325	0.479582	5.67839	1.35968e-08	3.56189e-06
Peak1	96.3949	2.80209	0.493805	5.67447	1.39115e-08	3.58256e-06
Ltb	69.0019	-1.92813	0.340396	-5.66438	1.47561e-08	3.73672e-06
Ankrd17	491.241	2.66133	0.470737	5.65355	1.57166e-08	3.91472e-06
Hcfc1	688.033	2.75702	0.489451	5.63288	1.77227e-08	4.20747e-06
Col6a3	256.914	3.94094	0.69962	5.63298	1.77121e-08	4.20747e-06
Nav2	209.962	3.51765	0.624356	5.63405	1.7603e-08	4.20747e-06
Sptan1	2133.24	2.59317	0.463129	5.59923	2.15303e-08	5.03278e-06
Col6a1	488.225	2.81965	0.505491	5.57804	2.43245e-08	5.4351e-06
Arid1a	371.189	3.00333	0.538193	5.5804	2.39967e-08	5.4351e-06
Nid2	59.6323	3.32217	0.595085	5.58268	2.36841e-08	5.4351e-06
Cic	567.886	2.53867	0.455558	5.57264	2.50901e-08	5.5249e-06
Lamc1	667.531	2.87454	0.516175	5.56893	2.56313e-08	5.56345e-06
C530008M17Rik	40.1121	2.70774	0.487086	5.55905	2.71242e-08	5.80458e-06
Kdr	86.9178	2.59193	0.466854	5.5519	2.82582e-08	5.96326e-06
Ptpn14	486.514	2.18345	0.393754	5.54521	2.93602e-08	6.11093e-06
Ogdhl	13.1681	-4.85136	0.879283	-5.51741	3.44034e-08	6.87796e-06
Ddit3	1162.97	-1.46728	0.265865	-5.51891	3.41107e-08	6.87796e-06
Szt2	79.1232	3.0625	0.554615	5.52185	3.35441e-08	6.87796e-06
Dvl3	245.544	2.31384	0.420427	5.50354	3.72233e-08	7.2509e-06
Bptf	357.649	3.00346	0.545535	5.50553	3.68069e-08	7.2509e-06
Nav1	470.245	3.16758	0.577145	5.48835	4.05698e-08	7.80276e-06
Supt6	877.664	2.31536	0.42221	5.48389	4.16063e-08	7.80842e-06
Acaca	259.529	2.46538	0.449574	5.48381	4.16271e-08	7.80842e-06
Rreb1	109.923	3.16534	0.580624	5.45161	4.99145e-08	9.24879e-06
Flt1	170.164	2.25897	0.415567	5.43587	5.45295e-08	9.98218e-06
Crtc3	223.376	2.22219	0.409125	5.43157	5.58612e-08	1.01042e-05
Ylpm1	322.959	2.77635	0.51176	5.4251	5.79225e-08	1.02334e-05
Pcdh1	133.579	1.90433	0.351	5.42545	5.78099e-08	1.02334e-05
2700081O15Rik	207.247	1.79637	0.331254	5.42293	5.86312e-08	1.02396e-05
Tnc	441.119	3.47901	0.642145	5.41779	6.03415e-08	1.04185e-05
Ago1	187.538	2.13353	0.394535	5.40771	6.38349e-08	1.08978e-05
Tubgcp6	157.251	1.99443	0.369084	5.40374	6.5264e-08	1.1018e-05
Taok2	516.733	1.94728	0.36098	5.39442	6.87466e-08	1.14784e-05
Nes	167.927	3.21646	0.597975	5.37892	7.49323e-08	1.23752e-05
Bfsp2	3304.66	-1.77195	0.330064	-5.3685	7.93941e-08	1.26389e-05
Lhfpl4	41.6641	2.83617	0.528768	5.36373	8.15201e-08	1.26389e-05
C2cd3	170.913	2.51672	0.468921	5.36706	8.00308e-08	1.26389e-05
Bcl9l	188.298	2.7176	0.506639	5.36398	8.14092e-08	1.26389e-05
Fryl	173.786	3.36381	0.626465	5.36951	7.8949e-08	1.26389e-05
Cfap54	565.721	1.61846	0.302041	5.35842	8.39532e-08	1.27559e-05
Nf1	525.514	2.26873	0.423337	5.35916	8.36106e-08	1.27559e-05
4930402H24Rik	326.601	1.63598	0.305829	5.34932	8.82842e-08	1.31509e-05
Adgrl2	1155.17	2.35971	0.440992	5.35091	8.7512e-08	1.31509e-05
Sox6	563.589	1.59511	0.298328	5.34683	8.95089e-08	1.32039e-05
Smchd1	477.194	2.03897	0.381916	5.3388	9.35648e-08	1.36412e-05
Slk	581.74	2.25155	0.42184	5.33744	9.42694e-08	1.36412e-05
Ldlr	945.689	1.92684	0.361179	5.33487	9.56116e-08	1.37049e-05
Kdm6b	300.93	3.06357	0.575559	5.32277	1.02196e-07	1.44723e-05
Phlpp1	198.933	2.37538	0.446368	5.32158	1.0287e-07	1.44723e-05
mt-Nd4	6694.12	2.24039	0.42168	5.313	1.07833e-07	1.50314e-05
Scd2	12782.9	2.05288	0.386781	5.30761	1.11075e-07	1.53425e-05
Igsf3	536.05	2.13928	0.404054	5.29453	1.19324e-07	1.63335e-05
Myo10	619.976	2.93317	0.555985	5.27563	1.32299e-07	1.79478e-05
Ndst1	436.976	2.30996	0.438641	5.26617	1.39296e-07	1.87298e-05
Kidins220	715.68	2.17242	0.412875	5.26168	1.42744e-07	1.9025e-05
Hectd1	622.23	2.95759	0.563521	5.2484	1.53423e-07	2.02705e-05
Cad	694.004	2.12868	0.406149	5.24114	1.59591e-07	2.09036e-05
Shox2	134.386	2.11077	0.403145	5.23575	1.64313e-07	2.13382e-05
Ncoa6	254.934	3.04998	0.583009	5.23145	1.68188e-07	2.14744e-05
Soga1	73.5365	3.50577	0.670012	5.23239	1.67329e-07	2.14744e-05
Srrm2	1288.76	2.96433	0.56693	5.22874	1.70667e-07	2.16093e-05
Fam193a	231.342	2.41146	0.462019	5.2194	1.79506e-07	2.23742e-05
Prrc2c	554.817	3.10784	0.595797	5.21627	1.82561e-07	2.23742e-05
Gcn1l1	560.958	2.69416	0.516457	5.21663	1.82211e-07	2.23742e-05
Map1b	120.47	2.94355	0.564307	5.21623	1.82598e-07	2.23742e-05
Lck	370.61	-2.04545	0.392616	-5.20979	1.89053e-07	2.29798e-05
Zfp629	201.972	2.21887	0.427027	5.19608	2.03535e-07	2.45437e-05
Neo1	515.629	2.2804	0.439071	5.19369	2.06167e-07	2.46653e-05
Arhgap31	457.218	2.46186	0.475001	5.18286	2.18511e-07	2.53439e-05
Kdm4b	740.302	1.45613	0.280921	5.1834	2.17882e-07	2.53439e-05
Ralgapb	521.531	1.72979	0.333621	5.18489	2.16146e-07	2.53439e-05
Lamb2	412.267	2.54788	0.491525	5.18362	2.17615e-07	2.53439e-05
Hectd4	147.718	2.89235	0.558921	5.17488	2.28055e-07	2.62505e-05
Tet3	233.032	2.87417	0.558003	5.15082	2.59346e-07	2.86318e-05
Golga4	292.259	3.23201	0.626897	5.15556	2.52872e-07	2.86318e-05
Dag1	1823.93	2.27623	0.441959	5.15032	2.60049e-07	2.86318e-05
Arhgap32	83.865	3.06912	0.595513	5.15374	2.55348e-07	2.86318e-05
Kmt2d	217.501	3.68862	0.715934	5.15218	2.57472e-07	2.86318e-05
Kif13b	81.3602	2.674	0.518603	5.15616	2.5206e-07	2.86318e-05
Vps13d	174.988	2.63732	0.512563	5.14535	2.6702e-07	2.89793e-05
Tpcn1	563.504	2.0025	0.38917	5.14556	2.66723e-07	2.89793e-05
Trerf1	173.909	2.09817	0.407991	5.14268	2.70847e-07	2.89806e-05
Celsr2	76.2453	3.86287	0.751017	5.14352	2.69638e-07	2.89806e-05
Adcy3	359.052	2.05595	0.399891	5.14127	2.72881e-07	2.89941e-05
Ash1l	239.483	2.69013	0.524722	5.12677	2.94756e-07	3.08863e-05
Camsap1	247.627	2.1854	0.426553	5.12339	3.00089e-07	3.12299e-05
Enah	835.986	1.88725	0.369519	5.10731	3.26775e-07	3.37756e-05
Plagl1	1028.03	3.22294	0.632465	5.09583	3.47213e-07	3.53106e-05
Svil	77.6543	2.46123	0.483327	5.09228	3.53784e-07	3.53106e-05
Col15a1	315.387	2.1312	0.418697	5.09009	3.57894e-07	3.53106e-05
Tln1	2018.98	2.6058	0.511506	5.09436	3.4992e-07	3.53106e-05
Sh3pxd2b	650.819	2.17616	0.427462	5.09089	3.56387e-07	3.53106e-05
Kif1b	243.699	2.25277	0.442527	5.09068	3.56776e-07	3.53106e-05
Bend4	118.212	2.42531	0.475926	5.09599	3.46926e-07	3.53106e-05
Slc23a2	367.704	2.02993	0.398995	5.0876	3.62617e-07	3.54198e-05
Golga3	233.935	1.98607	0.390416	5.08706	3.63662e-07	3.54198e-05
Zmiz1	175.383	3.45274	0.679324	5.08261	3.72278e-07	3.6028e-05
Plcg1	542.6	2.01621	0.397046	5.07803	3.81359e-07	3.62148e-05
Patj	100.912	1.96144	0.386211	5.07867	3.80084e-07	3.62148e-05
Psme2	3749.39	-1.8784	0.36985	-5.07881	3.79813e-07	3.62148e-05
AI464131	28.3965	3.23241	0.636703	5.07679	3.8387e-07	3.62268e-05
Kdm5b	457.713	2.13637	0.422111	5.06115	4.16731e-07	3.88455e-05
Proser1	173.38	2.07971	0.410845	5.06203	4.14825e-07	3.88455e-05
Pom121	492.445	2.53602	0.501538	5.05648	4.27073e-07	3.95667e-05
St5	491.796	1.58178	0.313097	5.05206	4.37066e-07	4.02472e-05
Ulk1	246.167	2.1478	0.425396	5.04894	4.44263e-07	4.06634e-05
Cdk12	163.442	2.10017	0.416442	5.04313	4.5799e-07	4.14208e-05
Tiam2	89.8117	1.6512	0.327371	5.04383	4.56312e-07	4.14208e-05
Tsc2	656.72	2.51097	0.498202	5.04007	4.65358e-07	4.16583e-05
Sptbn1	1198.09	2.2717	0.450756	5.03977	4.66099e-07	4.16583e-05
Npc1	791.185	2.18013	0.432843	5.03677	4.73441e-07	4.18225e-05
Afdn	599.769	2.14759	0.426347	5.0372	4.72398e-07	4.18225e-05
Tmem246	84.9853	1.61334	0.320645	5.03155	4.86539e-07	4.27311e-05
Fxyd1	210.332	-1.76817	0.351497	-5.03041	4.89429e-07	4.27378e-05
Nisch	1619.7	1.81731	0.361359	5.02909	4.92822e-07	4.27882e-05
Wipf2	228.045	2.19382	0.436734	5.02324	5.08079e-07	4.38622e-05
Wnk4	243.856	2.09489	0.417288	5.02026	5.16027e-07	4.42967e-05
Wdfy3	237.2	2.57324	0.513098	5.01509	5.30074e-07	4.52469e-05
Myh9	1873.39	2.76737	0.552082	5.01261	5.36958e-07	4.53532e-05
Pik3r1	154.41	1.84291	0.367664	5.01249	5.3729e-07	4.53532e-05
Man2a1	551.824	2.26397	0.451772	5.01132	5.40592e-07	4.53799e-05
Defb25	12.3683	-6.55558	1.31233	-4.99536	5.8727e-07	4.90273e-05
Notch3	41.0686	3.19187	0.640065	4.98678	6.13937e-07	5.09736e-05
Luzp1	480.997	2.14992	0.431333	4.98435	6.21689e-07	5.13367e-05
Kif13a	113.077	2.79805	0.562384	4.97534	6.51346e-07	5.34948e-05
Phf2	256.331	2.37007	0.476768	4.97112	6.65685e-07	5.43786e-05
Brd4	1107.54	2.59081	0.521288	4.97002	6.69461e-07	5.43946e-05
Kmt2b	225.314	2.30125	0.463686	4.96296	6.94278e-07	5.59625e-05
Plxna1	1465.95	2.27087	0.457611	4.96244	6.96124e-07	5.59625e-05
Trak2	1034.5	1.89437	0.382252	4.95581	7.20295e-07	5.74737e-05
Neurl4	456.883	1.58353	0.319568	4.95522	7.22488e-07	5.74737e-05
Apc	209.64	2.5981	0.524558	4.95292	7.31067e-07	5.75536e-05
Kat6b	87.2459	2.53648	0.512017	4.9539	7.274e-07	5.75536e-05
Pi4ka	947.014	1.96272	0.396376	4.95166	7.35848e-07	5.76313e-05
Gpatch8	323.163	1.92015	0.38791	4.95	7.42141e-07	5.78261e-05
Tnrc18	149.519	3.14732	0.636848	4.94203	7.73142e-07	5.99343e-05
Rgs1	62.4609	-2.50772	0.507612	-4.94023	7.80319e-07	6.01836e-05
Arhgap35	693.118	2.12927	0.431139	4.93872	7.86381e-07	6.03448e-05
Ncoa2	202.557	2.22547	0.450801	4.93669	7.946e-07	6.06691e-05
Snrnp200	808.232	2.43513	0.493444	4.93496	8.01674e-07	6.09032e-05
Npr2	138.27	1.96785	0.399007	4.93187	8.14461e-07	6.09602e-05
Cep250	150.714	3.00806	0.609908	4.93199	8.13946e-07	6.09602e-05
Ubr4	549.986	2.83917	0.575669	4.93195	8.14139e-07	6.09602e-05
Dot1l	538.308	2.3048	0.467501	4.93004	8.22122e-07	6.1232e-05
Kmt2e	216.556	2.79554	0.567209	4.92858	8.28286e-07	6.13901e-05
Prpf8	2068.03	2.30892	0.468739	4.92581	8.40133e-07	6.16666e-05
Zfp609	264.096	2.76854	0.561941	4.92675	8.36107e-07	6.16666e-05
Zswim8	440.702	1.92718	0.391482	4.92278	8.53233e-07	6.2327e-05
Psme2b	1059.15	-1.85353	0.376698	-4.92047	8.63371e-07	6.27658e-05
Sik1	784.936	2.66961	0.543398	4.9128	8.97841e-07	6.46796e-05
Col5a2	429.726	2.58076	0.525422	4.91179	9.02466e-07	6.46796e-05
Lmtk2	737.844	2.19141	0.446152	4.91179	9.02467e-07	6.46796e-05
Atrn	262.888	2.12341	0.432598	4.90851	9.17709e-07	6.54633e-05
Nid1	249.346	2.47886	0.505446	4.9043	9.37591e-07	6.65689e-05
Trp53bp1	334.704	1.66709	0.340144	4.90112	9.52901e-07	6.73413e-05
Tead1	209.554	2.95408	0.603615	4.89397	9.88199e-07	6.95125e-05
Dcbld2	482.314	1.50812	0.308359	4.89081	1.00423e-06	7.03147e-05
Lrp5	640.628	2.39501	0.490164	4.88615	1.02828e-06	7.16683e-05
Pik3r4	249.109	1.76396	0.361139	4.88443	1.03727e-06	7.19646e-05
Bahcc1	134.437	2.71797	0.557239	4.87756	1.07405e-06	7.41781e-05
Cluh	1940	1.24558	0.255568	4.87377	1.09489e-06	7.5123e-05
Ift172	164.189	2.47867	0.508625	4.87328	1.09762e-06	7.5123e-05
Arhgef17	171.432	2.55564	0.524723	4.87045	1.11347e-06	7.55268e-05
Fnip2	459.838	2.19073	0.449795	4.87049	1.1132e-06	7.55268e-05
Tanc1	609.541	2.0096	0.412765	4.86862	1.1238e-06	7.58887e-05
Iqsec1	315.843	2.27965	0.468537	4.86547	1.14185e-06	7.67667e-05
Pfas	398.591	1.6132	0.331873	4.86091	1.16848e-06	7.82108e-05
Sobp	75.217	2.34691	0.483047	4.85856	1.18241e-06	7.87961e-05
Gbf1	818.173	2.27766	0.469063	4.85576	1.19926e-06	7.95641e-05
Sema6d	248.563	2.29926	0.473595	4.85491	1.20441e-06	7.95641e-05
Cep170b	669.214	2.18063	0.449956	4.84631	1.25776e-06	8.27293e-05
Dnm1	327.1	2.43793	0.503244	4.84443	1.26973e-06	8.31561e-05
Trp53inp2	1401.65	1.75641	0.362661	4.84312	1.27818e-06	8.33506e-05
Asap2	130.792	1.87001	0.386272	4.84117	1.29076e-06	8.38113e-05
Plec	294.444	2.82353	0.583954	4.8352	1.33012e-06	8.56348e-05
Atg9a	327.629	2.17328	0.449445	4.83548	1.32824e-06	8.56348e-05
Col1a2	2199.04	2.79633	0.579041	4.82924	1.37057e-06	8.75689e-05
Rnf169	161.915	1.88068	0.389449	4.82908	1.37169e-06	8.75689e-05
Chd1	295.046	2.03297	0.421129	4.82743	1.38305e-06	8.79248e-05
Fastkd1	271.587	1.10115	0.228322	4.8228	1.4156e-06	8.96031e-05
Clasp1	476.204	2.31188	0.479558	4.82086	1.42943e-06	8.97471e-05
Wnk1	833.51	2.45288	0.50916	4.8175	1.45369e-06	9.08947e-05
Atg2b	388.858	2.19395	0.455728	4.81416	1.47822e-06	9.20496e-05
Nup214	376.69	2.05479	0.427558	4.80587	1.54081e-06	9.51668e-05
Prkar2a	457.864	1.51668	0.315718	4.8039	1.55607e-06	9.57201e-05
Pitpnm2	164.074	2.54464	0.529968	4.80149	1.57487e-06	9.6486e-05
Arhgef12	744.266	1.99674	0.415982	4.80006	1.58618e-06	9.6789e-05
Map3k4	455.566	1.79278	0.373752	4.79672	1.61286e-06	9.72454e-05
Per1	314.948	1.87813	0.391518	4.79704	1.61025e-06	9.72454e-05
Fabp5	6224.19	-1.57292	0.327879	-4.79725	1.60858e-06	9.72454e-05
Blvrb	640.555	-2.00545	0.418235	-4.79503	1.62647e-06	9.76781e-05
Pcnt	141.862	2.90942	0.607316	4.79062	1.66267e-06	9.94593e-05
Cpd	407.641	2.15038	0.449003	4.78924	1.67417e-06	9.97544e-05
Lrp8	358.48	1.99635	0.417151	4.78569	1.70404e-06	0.000101137
Brca1	4019.26	-1.35442	0.283115	-4.78397	1.71865e-06	0.000101607
2410006H16Rik	5273.55	-2.37572	0.496759	-4.78244	1.73184e-06	0.000101991
Foxo1	108.495	2.14991	0.449792	4.77979	1.75477e-06	0.000102942
Arid1b	353.251	2.04177	0.427329	4.77798	1.77061e-06	0.000103472
Prelp	82.7996	2.46871	0.516952	4.77551	1.79252e-06	0.000104351
Adgrf5	112.567	2.20831	0.462784	4.77178	1.82602e-06	0.000105895
Bend3	143.128	1.89988	0.398223	4.77089	1.8341e-06	0.00010596
Sel1l	1085.25	1.59611	0.334702	4.76876	1.85368e-06	0.000106685
Gm20559	122.641	-2.94926	0.619416	-4.76136	1.92294e-06	0.000110253
Slc7a1	1478.67	1.57869	0.331711	4.75922	1.94343e-06	0.000110593
Plxnb1	326.548	2.26965	0.476856	4.75961	1.93969e-06	0.000110593
Baz2a	295.984	2.51286	0.528329	4.75624	1.97228e-06	0.000111816
Nsa2	2029.56	-1.18906	0.250103	-4.75428	1.99157e-06	0.00011249
Rapgef1	1395.78	2.22494	0.468173	4.75238	2.01033e-06	0.000113129
Col18a1	238.66	2.41428	0.508302	4.7497	2.03717e-06	0.000113428
Rad52	247.305	-1.33062	0.280072	-4.75099	2.02419e-06	0.000113428
Trrap	441.126	2.74805	0.578647	4.74909	2.04334e-06	0.000113428
Tmem151b	76.2205	1.75724	0.370032	4.74888	2.04549e-06	0.000113428
Mgat5	1937.96	1.66864	0.351641	4.7453	2.08198e-06	0.000115031
Cul7	1255.27	1.94148	0.409406	4.74219	2.11415e-06	0.000116386
Rrbp1	1432.67	2.22658	0.46968	4.74064	2.13045e-06	0.000116859
Polr1a	536.217	1.74451	0.368209	4.73781	2.16042e-06	0.000118077
Ncoa1	257.565	2.12659	0.449673	4.72919	2.25422e-06	0.000122762
Dst	1005.27	2.99363	0.633995	4.72186	2.337e-06	0.000126432
Arfgef2	313.381	2.21515	0.469138	4.72175	2.33824e-06	0.000126432
Traf3	321.748	2.29655	0.486476	4.72079	2.34927e-06	0.000126578
Asxl1	452.628	1.947	0.413175	4.71229	2.4495e-06	0.000131511
Dock5	166.391	2.51078	0.532997	4.71068	2.46887e-06	0.000131668
Msi1	139.912	2.12088	0.450234	4.71061	2.46976e-06	0.000131668
Dnmt3a	511.025	2.33017	0.495014	4.70729	2.51031e-06	0.000132898
Zbtb40	118.115	1.81386	0.385284	4.70784	2.5035e-06	0.000132898
Dip2c	486.409	1.96628	0.418199	4.70177	2.57911e-06	0.000136066
Smarca4	1832.84	2.01725	0.429482	4.69693	2.64096e-06	0.000138522
Glis3	32.4071	2.98947	0.636503	4.69671	2.6439e-06	0.000138522
Zmat3	569.52	1.25073	0.266425	4.69451	2.67243e-06	0.000139058
Tnks1bp1	419.839	2.39704	0.510916	4.69165	2.71004e-06	0.000140534
Insr	128.951	2.29014	0.488371	4.68935	2.74069e-06	0.00014164
Mast2	481.178	2.30438	0.491564	4.68785	2.76087e-06	0.000142197
Tmem40	55.6136	-2.82087	0.601829	-4.68716	2.7702e-06	0.000142197
Arhgef40	236.058	1.71083	0.365164	4.6851	2.79822e-06	0.000142672
Usp36	323.553	1.8855	0.402392	4.68573	2.78966e-06	0.000142672
Wdr81	207.874	2.2281	0.475794	4.68291	2.82829e-06	0.000143723
Aebp1	2766.3	2.12182	0.453511	4.67865	2.88776e-06	0.000146256
Scd1	2614.52	1.47823	0.317025	4.66281	3.11924e-06	0.000156817
Edem3	265.629	1.93188	0.414363	4.66228	3.12725e-06	0.000156817
Tanc2	67.3658	2.49092	0.534119	4.66361	3.10712e-06	0.000156817
mt-Cytb	36636.6	1.70102	0.365038	4.65985	3.16438e-06	0.000158157
Trip12	1911.14	1.66792	0.358171	4.65676	3.21217e-06	0.000159684
Cyp2u1	189.275	1.72598	0.370659	4.65652	3.21596e-06	0.000159684
Mtor	299.193	1.9697	0.42343	4.65177	3.29102e-06	0.000162879
Tspan32	96.4401	-2.00508	0.431408	-4.64775	3.3557e-06	0.000165541
Macf1	498.747	2.40082	0.516675	4.64667	3.37334e-06	0.000165872
Gzmc	87.1193	-3.25286	0.700246	-4.64531	3.39572e-06	0.000165899
Mlxip	244.239	2.05107	0.442065	4.63973	3.48858e-06	0.000169406
Lgals7	93.9948	-1.94284	0.418746	-4.63966	3.48981e-06	0.000169406
Fat1	467.076	2.82477	0.609003	4.63834	3.51216e-06	0.000169948
Glg1	577.749	2.32008	0.500311	4.63728	3.53021e-06	0.000170279
Clcn5	250.052	1.86817	0.402947	4.63626	3.54764e-06	0.000170557
Pxdn	138.548	2.68844	0.579952	4.63564	3.55842e-06	0.000170557
Ulbp1	75.3765	1.85868	0.401086	4.63412	3.58451e-06	0.000171267
Ssh2	121.616	1.74684	0.377045	4.63299	3.60421e-06	0.000171629
Ier2	649.651	-1.00332	0.216588	-4.63239	3.61466e-06	0.000171629
Ptpn23	611.115	2.50144	0.540276	4.62993	3.65797e-06	0.000173144
Mdc1	506.506	1.52943	0.330392	4.62912	3.67226e-06	0.00017328
Mapk13	330.052	-1.45309	0.313995	-4.62775	3.69657e-06	0.000173888
Numa1	633.758	2.27843	0.492418	4.62702	3.70957e-06	0.000173961
Trim32	258.38	1.91966	0.414945	4.62629	3.72273e-06	0.00017404
Xylt1	78.1034	2.07736	0.449157	4.62501	3.74573e-06	0.000174187
Ndst2	213.817	1.34745	0.29136	4.62468	3.75178e-06	0.000174187
Rad54l2	196.226	2.01768	0.43633	4.62421	3.76025e-06	0.000174187
Epb41l4b	160.447	1.3917	0.301078	4.62239	3.79352e-06	0.000175194
Myo7a	1284.95	1.82376	0.394833	4.61905	3.85492e-06	0.00017749
Sort1	3635.88	1.4154	0.306621	4.61611	3.90995e-06	0.00017948
Sap130	330.049	2.07817	0.450486	4.61317	3.96567e-06	0.000181489
Col16a1	432.549	2.4727	0.536416	4.60968	4.03297e-06	0.000183464
Camsap2	277.438	2.36955	0.514039	4.60968	4.03295e-06	0.000183464
Gm19385	17.0923	-2.96888	0.644509	-4.60642	4.09656e-06	0.0001858
Cnot1	1391.79	1.78948	0.388657	4.60427	4.13921e-06	0.000186621
Setd1b	111.328	3.1192	0.677384	4.60477	4.12918e-06	0.000186621
Crocc	249.281	2.71342	0.589431	4.60345	4.15541e-06	0.000186797
Usp24	406.175	1.84547	0.401012	4.60203	4.18384e-06	0.000186968
Clec16a	348.371	1.53084	0.332613	4.60245	4.17557e-06	0.000186968
Pdgfrb	130.325	2.33385	0.507215	4.60131	4.19836e-06	0.000187067
Ep300	241.178	2.46627	0.536091	4.60046	4.21549e-06	0.000187281
Lrrk1	402.998	1.73215	0.377163	4.59259	4.37777e-06	0.000192319
Zfp142	93.0737	3.40891	0.742166	4.59319	4.36522e-06	0.000192319
Dnajc13	656.746	1.80959	0.394083	4.59191	4.39218e-06	0.000192319
Rpap1	399.149	1.54629	0.336658	4.59307	4.36774e-06	0.000192319
Fam178b	113.908	-1.72165	0.374889	-4.59242	4.38127e-06	0.000192319
Vps13c	143.431	2.59887	0.56607	4.59107	4.40975e-06	0.000192534
Mcm3ap	370.211	1.66816	0.363412	4.59027	4.42676e-06	0.000192723
Mtmr4	514.69	1.33465	0.290818	4.58929	4.44756e-06	0.000192995
Bcorl1	102.99	2.52789	0.550885	4.58878	4.45841e-06	0.000192995
Glipr1	102.049	-2.39807	0.523175	-4.58369	4.5685e-06	0.000197198
Nqo1	145.963	-1.51055	0.329699	-4.5816	4.61434e-06	0.000198613
Adcy7	734.054	1.67018	0.364913	4.57693	4.71847e-06	0.000202521
Hdac4	275.302	2.08145	0.455052	4.57409	4.78287e-06	0.000204707
6430548M08Rik	249.646	1.56299	0.341844	4.57222	4.82591e-06	0.000205969
Ttll5	236.613	1.51797	0.332429	4.56629	4.96442e-06	0.000211287
Mki67	891.115	2.69912	0.591221	4.56533	4.9872e-06	0.000211664
Cdc42bpa	176.639	2.4222	0.530691	4.56425	5.01289e-06	0.000212161
Ntng2	43.3675	2.82464	0.618998	4.56325	5.03679e-06	0.000212581
Pld1	101.589	1.69721	0.372244	4.55941	5.12979e-06	0.000215906
Prr14l	188.99	2.10109	0.460899	4.55868	5.14762e-06	0.000216058
Asap1	305.148	2.07581	0.455458	4.55764	5.17315e-06	0.000216531
Psme1	6207.96	-1.61039	0.353472	-4.55592	5.21565e-06	0.000217364
Atg2a	179.837	2.24698	0.493227	4.55568	5.22166e-06	0.000217364
Cbl	218.749	2.34548	0.514998	4.55434	5.25494e-06	0.000218152
Erc1	184.326	2.24876	0.494258	4.54978	5.37017e-06	0.000222328
Sema4g	136.67	2.06984	0.455078	4.54832	5.40748e-06	0.000223264
Cdc42bpb	1199.74	2.52706	0.555804	4.54667	5.45008e-06	0.000223807
Gatad2b	467.578	1.60952	0.353969	4.54705	5.44032e-06	0.000223807
Dip2a	170.696	2.16303	0.476056	4.54365	5.52879e-06	0.00022619
Frmd4a	536.168	2.22476	0.489792	4.54226	5.56549e-06	0.000226708
Lrpprc	848.684	1.55568	0.342678	4.53976	5.63176e-06	0.000228794
Mkl2	201.646	2.33861	0.515248	4.5388	5.6575e-06	0.000228888
Kif14	231.939	1.55274	0.342123	4.53855	5.66419e-06	0.000228888
Hebp1	93.4812	-2.41446	0.532113	-4.53748	5.69293e-06	0.000229439
Trim56	172.718	2.81279	0.620011	4.53668	5.71476e-06	0.000229709
Lat	62.9285	-2.05529	0.453288	-4.53419	5.78258e-06	0.000230605
Ddx6	1093.79	1.86638	0.411595	4.5345	5.77405e-06	0.000230605
Kif21b	713.296	2.71073	0.597807	4.53446	5.7751e-06	0.000230605
Mon2	350.189	1.63933	0.361704	4.53224	5.83602e-06	0.000231521
Chd3	243.961	2.39786	0.529161	4.53143	5.85848e-06	0.000231807
Psmb9	2752.39	-2.45544	0.542137	-4.52918	5.92117e-06	0.000233678
Zfp865	182.521	1.62686	0.359268	4.52825	5.9474e-06	0.000234106
Ankhd1	276.401	1.99521	0.440681	4.52756	5.96684e-06	0.000234264
Bmpr2	495.592	2.18002	0.482141	4.52154	6.13921e-06	0.00024041
Nsd1	128.731	1.96641	0.435034	4.52014	6.17995e-06	0.000241383
Man2a2	414.739	1.58571	0.351106	4.51633	6.29219e-06	0.000245137
Dysf	28.7818	3.54222	0.784572	4.51485	6.33616e-06	0.000246219
Map4	1272.12	1.90338	0.421802	4.51249	6.40704e-06	0.000247706
Aak1	439.619	1.86442	0.413124	4.51297	6.39261e-06	0.000247706
Abl2	229.979	2.11681	0.469263	4.51092	6.45466e-06	0.000248914
Castor2	148.414	2.05173	0.455273	4.50659	6.58773e-06	0.000252982
Ptprg	205.296	1.94729	0.432115	4.50641	6.59344e-06	0.000252982
Nup210	874.152	1.80948	0.401925	4.50203	6.73068e-06	0.000257597
Rptor	553.405	1.58603	0.352506	4.49929	6.81803e-06	0.000260203
1110038B12Rik	1547.4	-1.56304	0.347432	-4.49882	6.83301e-06	0.000260203
Pla2g5	229.357	-1.27654	0.283812	-4.49785	6.86441e-06	0.000260745
Lrp6	408.46	2.22665	0.495378	4.49486	6.9615e-06	0.000263773
Cela1	376.317	-2.00355	0.446141	-4.49084	7.09417e-06	0.000267
Emc1	219.809	1.79531	0.399784	4.49069	7.09938e-06	0.000267
Clstn1	1360.82	1.68817	0.376056	4.48913	7.15131e-06	0.000268289
Irgq	197.366	2.01998	0.451152	4.47739	7.5562e-06	0.000282129
Setx	242.383	2.4325	0.54329	4.47735	7.55736e-06	0.000282129
Ifi27	4432.37	-1.34559	0.3006	-4.47633	7.59376e-06	0.000282793
Lyst	328.055	2.22079	0.496535	4.47258	7.72813e-06	0.000287093
Ptprs	2226.47	1.76224	0.39416	4.47087	7.79012e-06	0.00028869
Nfic	783.82	2.22345	0.49767	4.46771	7.90614e-06	0.000292277
Notch4	69.483	2.53467	0.56775	4.46441	8.0288e-06	0.000296091
Nin	175.347	2.48676	0.557111	4.46367	8.05676e-06	0.000296403
Mgst1	465.749	-1.83582	0.411441	-4.46194	8.12213e-06	0.000297368
Ube4b	470.757	2.13878	0.479333	4.46198	8.12057e-06	0.000297368
Hipk3	600.072	1.39415	0.312495	4.46135	8.14458e-06	0.000297473
Tiam1	445.79	1.75602	0.39389	4.45815	8.26692e-06	0.000301217
Unc13b	26.0704	2.71474	0.609048	4.45735	8.29787e-06	0.000301622
Slc36a1	236.663	2.01673	0.452987	4.45206	8.50485e-06	0.000307953
Icmt	509.438	1.26025	0.283084	4.45187	8.5126e-06	0.000307953
Bst2	4409.15	-1.53755	0.345521	-4.44996	8.5886e-06	0.00030923
Brwd3	169.232	2.18605	0.491201	4.45042	8.57013e-06	0.00030923
Zfp618	57.9928	2.01595	0.453201	4.44825	8.65731e-06	0.000310967
Igf1r	164.591	2.69394	0.606195	4.44401	8.82967e-06	0.00031641
Zfp704	215.722	2.18812	0.49253	4.44262	8.88709e-06	0.000317719
Kat6a	156.307	2.6191	0.590054	4.43875	9.04834e-06	0.000322724
1700017B05Rik	393.462	1.72165	0.387973	4.43755	9.09898e-06	0.00032377
Cep164	324.788	1.79258	0.404302	4.43376	9.26017e-06	0.000328736
Adam12	648.56	1.87648	0.423345	4.4325	9.31447e-06	0.000329893
Atp2b1	280.458	2.1088	0.476072	4.42958	9.44157e-06	0.000333617
Safb	752.597	2.03162	0.458719	4.4289	9.47155e-06	0.0003339
Megf6	360.388	2.13156	0.481699	4.42508	9.64062e-06	0.000339073
Cd248	174.348	1.97821	0.447678	4.41882	9.92401e-06	0.000348234
Cnnm3	296.889	1.35304	0.306285	4.41759	9.98058e-06	0.000349412
Il18	81.9921	-1.7458	0.395257	-4.41688	1.00135e-05	0.000349759
Map1a	47.4169	2.87369	0.651063	4.41385	1.0155e-05	0.000353887
Phf8	110.616	1.70567	0.386874	4.40885	1.03923e-05	0.000361328
Creb3l2	678.355	1.95497	0.443622	4.40684	1.04888e-05	0.00036385
Dicer1	371.507	2.18462	0.495937	4.40503	1.0577e-05	0.000366076
Man1c1	274.64	1.77178	0.402337	4.40374	1.06403e-05	0.000367427
Tmem245	429.366	1.92184	0.436846	4.39935	1.08574e-05	0.000373847
Lrrc8b	257.945	1.74404	0.396464	4.39899	1.08754e-05	0.000373847
Zc3h13	139.442	2.77527	0.631739	4.39306	1.11766e-05	0.000382487
Arid2	425.482	1.83421	0.417525	4.39305	1.11771e-05	0.000382487
Golim4	388.352	1.68224	0.383097	4.39117	1.12741e-05	0.000384709
Ticrr	140.539	1.60565	0.365702	4.3906	1.13038e-05	0.000384709
Utp14b	242.34	1.51074	0.344107	4.39033	1.13179e-05	0.000384709
Jade2	185.174	1.8306	0.417478	4.3849	1.16039e-05	0.00039333
Synj1	163.368	1.80798	0.412353	4.38454	1.16234e-05	0.00039333
Dnmt1	1286.65	1.74642	0.398756	4.37967	1.18858e-05	0.000401316
Mfsd6	178.586	1.65089	0.37717	4.37704	1.20301e-05	0.00040529
Map3k5	205.812	2.12523	0.485879	4.37398	1.21999e-05	0.0004101
Itga1	133.413	1.75576	0.401491	4.37309	1.22502e-05	0.00041088
Snrk	225.205	1.63302	0.373733	4.3695	1.24532e-05	0.000416771
Eya1	191.401	1.52457	0.349414	4.36323	1.28158e-05	0.000427163
Cd3d	111.621	-2.8525	0.65377	-4.36316	1.28199e-05	0.000427163
Gtf3c1	949.239	1.87098	0.429146	4.35978	1.30192e-05	0.000430967
Lmo1	812.565	-1.78686	0.409784	-4.3605	1.29764e-05	0.000430967
Thrap3	978.043	1.33394	0.305945	4.36005	1.30034e-05	0.000430967
5830417I10Rik	69.4668	3.23215	0.741522	4.3588	1.30777e-05	0.000431962
Ankrd11	560.794	2.08833	0.479259	4.35741	1.31612e-05	0.000433776
Pdxk	661.625	1.18406	0.271806	4.35628	1.3229e-05	0.000435069
Atf7ip	405.424	1.89801	0.435827	4.35495	1.33097e-05	0.000436775
Tnrc6c	207.981	2.56494	0.589207	4.3532	1.34166e-05	0.000437451
Sec24a	221.985	1.91017	0.438774	4.35343	1.34021e-05	0.000437451
Itpkb	1106.82	1.48586	0.34127	4.35391	1.3373e-05	0.000437451
Lrrc8d	357.84	1.61994	0.372519	4.3486	1.37012e-05	0.000445772
Ttc28	104.904	2.46107	0.566647	4.34322	1.40409e-05	0.000455848
Dok7	168.215	1.34754	0.310307	4.3426	1.40808e-05	0.000456171
D5Ertd579e	287.864	1.6252	0.374485	4.33982	1.42598e-05	0.000460984
Atp6v0a1	1690.87	1.87186	0.431423	4.33881	1.43254e-05	0.000461523
Igf2r	679.541	2.23676	0.515546	4.33863	1.43372e-05	0.000461523
Gnaq	278.538	1.76791	0.407719	4.3361	1.45036e-05	0.00046491
Fbxo42	885.901	1.70929	0.39418	4.33631	1.44897e-05	0.00046491
Zfp516	184.245	2.18865	0.504868	4.3351	1.45696e-05	0.000466044
Lrba	266.434	2.06489	0.476401	4.33435	1.46192e-05	0.000466648
Larp4b	531.743	1.54127	0.355837	4.33139	1.4817e-05	0.000471377
Htt	391.146	1.95012	0.450435	4.32942	1.49506e-05	0.000474236
Amotl1	1011.04	1.76142	0.407124	4.3265	1.51498e-05	0.000478556
Pde8a	113.401	1.64872	0.381045	4.32684	1.51266e-05	0.000478556
Adgrl1	118.374	2.13203	0.492858	4.32586	1.5194e-05	0.000478959
Dock7	699.123	1.68059	0.388646	4.32421	1.53078e-05	0.000481104
Ogg1	489.009	-1.26301	0.292096	-4.32396	1.53254e-05	0.000481104
Ubd	180.321	-2.54766	0.589411	-4.32238	1.54355e-05	0.00048356
Bicral	77.5281	2.26726	0.52465	4.32146	1.54997e-05	0.000484574
Pbxip1	1176.81	1.40718	0.325674	4.32084	1.55439e-05	0.000484957
Fbf1	420.922	1.64482	0.381015	4.31694	1.58206e-05	0.000492578
Vps13b	235.897	2.04615	0.474147	4.31544	1.59285e-05	0.000494924
Hip1r	552.023	1.04561	0.242457	4.31256	1.61374e-05	0.000498356
Col1a1	2338.44	3.86822	0.896913	4.31282	1.61187e-05	0.000498356
Cers6	291.399	1.65324	0.383308	4.31309	1.60991e-05	0.000498356
Cdc42bpg	167.067	2.56832	0.595659	4.31174	1.61976e-05	0.000499203
Gli3	161.191	2.47189	0.573366	4.31118	1.62387e-05	0.000499454
Abcc9	49.4734	2.76443	0.641343	4.31037	1.62979e-05	0.000499944
Pkd1	476.255	1.82882	0.424314	4.31007	1.63204e-05	0.000499944
Bcr	388.489	2.38861	0.555168	4.30249	1.68887e-05	0.00051376
Hif1an	452.586	1.17479	0.273017	4.30301	1.68493e-05	0.00051376
Cdon	98.8389	2.01003	0.467149	4.30276	1.6868e-05	0.00051376
Tmsb4x	5032.08	-1.45656	0.338557	-4.30226	1.69067e-05	0.00051376
Vcpkmt	610.988	-1.31432	0.30564	-4.30021	1.70633e-05	0.000517485
Utrn	410.046	2.40305	0.559219	4.29716	1.72997e-05	0.000520571
Slc38a1	2765.74	1.50339	0.349797	4.29789	1.72433e-05	0.000520571
Plekhh2	22.2732	3.02971	0.705054	4.29713	1.73021e-05	0.000520571
Kmt2a	130.162	2.92078	0.680329	4.29319	1.76125e-05	0.000528361
Thada	146.916	1.62542	0.378625	4.29296	1.76306e-05	0.000528361
Slc9a1	233.629	2.44421	0.569888	4.28894	1.79529e-05	0.000534855
Cspg4	56.5318	2.38127	0.555148	4.28944	1.79126e-05	0.000534855
Med12	127.094	2.74739	0.640535	4.28921	1.79309e-05	0.000534855
Zfp512b	221.359	1.39837	0.326082	4.28839	1.79969e-05	0.000535118
Zfp319	151.23	2.15892	0.503901	4.2844	1.83229e-05	0.000542687
Ddx3x	1881.67	1.59986	0.373482	4.28365	1.83853e-05	0.000543377
Col3a1	4724.63	2.24483	0.524094	4.28326	1.84177e-05	0.000543377
Atrx	859.988	1.94996	0.455336	4.28247	1.84827e-05	0.000544238
Slc9a8	368.78	1.09743	0.256377	4.28051	1.86468e-05	0.000548008
Atp2a2	2529.85	1.7427	0.40731	4.27857	1.88097e-05	0.000550662
Spg11	301.166	1.95757	0.457514	4.27871	1.87977e-05	0.000550662
Dip2b	497.782	1.92523	0.450078	4.27755	1.88962e-05	0.000552133
Foxo3	447.949	1.84499	0.431869	4.27211	1.93635e-05	0.0005647
Aqr	550.16	1.55987	0.365236	4.27085	1.94727e-05	0.000565841
Kirrel	696.006	1.72545	0.40401	4.2708	1.94771e-05	0.000565841
Hspg2	387.003	2.85263	0.668333	4.26828	1.96987e-05	0.000571186
Lpin1	181.949	2.00512	0.470024	4.26599	1.99019e-05	0.000574102
Kdm2a	531.348	1.88435	0.441728	4.26587	1.99126e-05	0.000574102
H2-T22	2194.09	-1.95979	0.459327	-4.26664	1.98436e-05	0.000574102
Map3k20	399.562	1.15692	0.27131	4.26419	2.00626e-05	0.000577332
Cd52	752.767	-1.76649	0.41464	-4.2603	2.04156e-05	0.000585099
Strn	258.207	1.93733	0.454807	4.25969	2.04714e-05	0.000585099
Camk1	4029.73	-1.48472	0.348565	-4.25952	2.04866e-05	0.000585099
Fndc3b	222.45	2.11681	0.496833	4.2606	2.03876e-05	0.000585099
Gm48550	10.5963	-3.2326	0.759037	-4.25882	2.05507e-05	0.000585831
Dhx38	364.968	2.04796	0.481213	4.25582	2.08283e-05	0.000592631
Bag6	3444.49	1.35641	0.31876	4.25527	2.08796e-05	0.000592982
Amotl2	338.822	1.40929	0.331325	4.25348	2.10469e-05	0.000596618
Atxn2	396.321	2.31891	0.545732	4.24917	2.14567e-05	0.000605971
Ahnak2	189.661	2.36535	0.557061	4.24613	2.1749e-05	0.000613088
Ltbp3	732.913	2.30566	0.543308	4.24375	2.19818e-05	0.000618502
Trio	230.409	2.57405	0.606932	4.24108	2.22451e-05	0.000624506
Mbd6	254.058	2.39717	0.565271	4.24075	2.22774e-05	0.000624506
Arid5b	124.652	2.255	0.53216	4.23744	2.26083e-05	0.000631454
Ubr2	529.565	1.65969	0.39191	4.23489	2.28664e-05	0.00063749
D630045J12Rik	73.9496	2.27085	0.536536	4.23244	2.31173e-05	0.000643305
Gstm6	34.8274	-2.01231	0.475767	-4.22961	2.34097e-05	0.000650252
Tnrc6a	384.292	1.81	0.427978	4.22918	2.34546e-05	0.000650309
Baz1a	403.847	1.90953	0.45157	4.22863	2.35116e-05	0.000650701
Usp34	265.758	2.06227	0.488135	4.22479	2.39168e-05	0.000660714
2810004N23Rik	1412.05	-1.23461	0.292334	-4.22329	2.40767e-05	0.000662719
Hivep2	256.88	1.74429	0.413234	4.22106	2.43158e-05	0.000667703
Mfng	109.909	-1.49682	0.354653	-4.22053	2.43728e-05	0.000667703
Trak1	516.536	1.72454	0.408622	4.22038	2.43896e-05	0.000667703
Nbas	317.726	1.73336	0.410922	4.21821	2.46245e-05	0.000671714
Osbpl6	525.987	1.3435	0.318473	4.21857	2.45862e-05	0.000671714
Parp4	69.7442	2.7271	0.647408	4.21234	2.5274e-05	0.000686963
Qser1	295.853	2.00546	0.476083	4.21241	2.52662e-05	0.000686963
Psmb8	2027.04	-2.26432	0.538121	-4.20783	2.57838e-05	0.000698323
Rps26-ps1	381.869	-2.19299	0.52141	-4.20589	2.60062e-05	0.000703093
Wiz	557.458	2.37681	0.565375	4.20396	2.6229e-05	0.000705478
Phrf1	613.716	1.88489	0.448408	4.20352	2.62801e-05	0.000705478
E230025N22Rik	43.6744	-1.90261	0.452587	-4.20385	2.62407e-05	0.000705478
Ncs1	84.7852	1.96682	0.467833	4.20411	2.62117e-05	0.000705478
Depdc5	324.233	1.30163	0.309921	4.19988	2.67054e-05	0.00071563
Ep400	294.458	2.25152	0.536262	4.19855	2.68629e-05	0.000716457
Casp4	183.257	-1.93874	0.461776	-4.19845	2.6875e-05	0.000716457
Cerk	1244.57	1.11463	0.265487	4.19843	2.68778e-05	0.000716457
Shroom2	119.174	2.06305	0.491833	4.19461	2.73336e-05	0.000724912
Dennd4a	188.331	1.77491	0.423069	4.19533	2.72479e-05	0.000724912
Pcnx	371.167	2.06649	0.492789	4.19346	2.74733e-05	0.000726965
Fn1	1080.66	2.55804	0.610053	4.19315	2.75112e-05	0.000726965
5033406O09Rik	166.076	-1.41827	0.338301	-4.19232	2.76115e-05	0.00072835
Xlr3c	596.891	-1.75482	0.418645	-4.19166	2.76916e-05	0.000729197
Cenpe	248.051	1.91945	0.458158	4.1895	2.79568e-05	0.000734905
Zfp592	184.135	1.84862	0.44141	4.188	2.81429e-05	0.000737247
Ms4a7	377.013	-1.7526	0.418667	-4.18615	2.83721e-05	0.000740698
Trnp1	333.371	1.57746	0.376803	4.18644	2.83368e-05	0.000740698
Cpeb3	66.7545	2.03365	0.486061	4.18395	2.86493e-05	0.000746651
Gm28809	73.004	-2.37426	0.567549	-4.18336	2.87229e-05	0.000747287
Map7	87.0504	1.68784	0.403557	4.18241	2.88436e-05	0.000749144
Foxj2	132.792	1.78963	0.428065	4.18074	2.90558e-05	0.000752452
Tns2	345.242	1.88706	0.451382	4.18063	2.907e-05	0.000752452
mt-Nd2	13257.1	1.78853	0.42794	4.17939	2.92292e-05	0.000755287
Cpq	554.931	-1.26576	0.302942	-4.17822	2.93795e-05	0.000757882
Usp7	1076.95	1.54646	0.370322	4.17598	2.967e-05	0.000764079
Setd2	280.434	2.36152	0.565939	4.17275	3.00941e-05	0.000773689
Utp20	225.697	1.93851	0.464703	4.1715	3.02596e-05	0.000775319
Hipk1	390.321	1.83558	0.440027	4.17151	3.02582e-05	0.000775319
Trdmt1	406.547	-1.02218	0.245067	-4.17104	3.03209e-05	0.000775581
Clec4n	296.286	-1.58327	0.379798	-4.16873	3.06307e-05	0.000779569
Obscn	63.8248	2.03513	0.488178	4.16883	3.06163e-05	0.000779569
Bmp1	352.782	1.56213	0.374774	4.16818	3.07035e-05	0.000780116
Pycard	786.211	-2.01775	0.484143	-4.16767	3.07732e-05	0.000780582
Chd4	2309.31	2.0372	0.489022	4.16588	3.10155e-05	0.000785417
Eif3a	1998.87	2.23522	0.536788	4.16406	3.12637e-05	0.000790383
Ubr3	446.482	1.7329	0.416541	4.16021	3.17952e-05	0.000802487
Helz	271.774	2.32732	0.559594	4.15894	3.19729e-05	0.000805631
Malat1	162.383	2.29067	0.550914	4.15794	3.21137e-05	0.000807841
Efna5	159.118	1.7134	0.412123	4.1575	3.21747e-05	0.000808037
Samd4	92.4483	1.67921	0.404152	4.1549	3.25425e-05	0.000815926
Ednrb	117.394	1.73933	0.41887	4.15243	3.28963e-05	0.000822507
Sos1	258.984	1.76472	0.424997	4.15231	3.29133e-05	0.000822507
Samd4b	457.644	2.05727	0.495515	4.15179	3.29887e-05	0.000823038
Gmfg	147.515	-2.03945	0.491657	-4.14812	3.35215e-05	0.00083496
Dhx8	525.427	1.82699	0.440684	4.1458	3.3863e-05	0.000842087
Unc5c	736.611	1.47277	0.355375	4.14426	3.40907e-05	0.000846363
Uggt1	2151	1.44892	0.350371	4.1354	3.54344e-05	0.000878288
Clmn	369.05	1.51669	0.366947	4.13327	3.57634e-05	0.000884999
Cd163	29.2319	3.11322	0.753581	4.13124	3.60817e-05	0.000889257
Zfp318	162.12	1.99803	0.483592	4.13164	3.60186e-05	0.000889257
Map4k4	1656.06	1.46474	0.35457	4.13105	3.61111e-05	0.000889257
Abcc10	89.1617	1.62463	0.39348	4.12887	3.64548e-05	0.000896269
Clasp2	524.13	1.48492	0.359785	4.12725	3.67122e-05	0.000899686
Dhx9	975.974	2.10612	0.510273	4.12743	3.6684e-05	0.000899686
Tpr	856.857	2.03525	0.493288	4.12589	3.69306e-05	0.000901139
Sulf2	758.882	1.90419	0.461517	4.12594	3.69217e-05	0.000901139
Tecpr2	137.785	1.63763	0.396927	4.12577	3.69494e-05	0.000901139
Synpo	190.985	1.75915	0.426463	4.12496	3.70791e-05	0.000902853
Zfyve26	107.279	2.5197	0.611008	4.12384	3.7261e-05	0.000905831
Plin4	49.8198	2.64702	0.641998	4.1231	3.73812e-05	0.0009073
Eif4g3	710.58	2.11957	0.514164	4.12235	3.75022e-05	0.000908787
Nt5c3	1210.18	-1.12896	0.274069	-4.11927	3.80073e-05	0.000919559
Clspn	127.452	1.83644	0.446048	4.11713	3.83616e-05	0.000925615
Chd8	526.221	1.76325	0.428283	4.11702	3.83795e-05	0.000925615
Epg5	75.6089	2.5466	0.61887	4.11492	3.87308e-05	0.000932608
Itga6	225.51	1.50091	0.36502	4.11185	3.92498e-05	0.00094262
Nktr	261.023	1.81413	0.441247	4.11137	3.93327e-05	0.00094262
Miga1	282.444	1.76839	0.430116	4.11143	3.93213e-05	0.00094262
Pank1	185.805	1.13806	0.277204	4.10551	4.03421e-05	0.000965288
Extl3	661.813	1.18449	0.288655	4.10349	4.0697e-05	0.000970219
Cdh5	293.797	2.17698	0.530595	4.10291	4.07991e-05	0.000970219
Ttyh3	550.47	2.06033	0.502167	4.10288	4.08036e-05	0.000970219
Tmem201	579.021	1.69301	0.412638	4.10289	4.08013e-05	0.000970219
Cyfip2	598.802	1.82018	0.443792	4.10143	4.10606e-05	0.00097277
Usp20	144.696	1.02702	0.250403	4.10148	4.1051e-05	0.00097277
Abcc4	252.653	1.39283	0.339616	4.10119	4.1103e-05	0.00097277
Vwa8	631.029	1.8645	0.454752	4.10004	4.13076e-05	0.000976094
Ap3d1	1692.07	1.50128	0.366449	4.09684	4.18831e-05	0.000988156
Nav3	175.567	1.96142	0.479087	4.09409	4.23835e-05	0.00099841
Arhgef10l	493.703	1.4663	0.358264	4.0928	4.26191e-05	0.00100241
Zcchc14	149.363	2.11039	0.515742	4.09195	4.27767e-05	0.00100456
Zhx3	137.499	1.88317	0.460452	4.08983	4.31686e-05	0.0010122
Epas1	123.642	2.07031	0.506624	4.08647	4.37984e-05	0.00102538
Aoc3	64.4664	2.6571	0.650453	4.085	4.40767e-05	0.00103031
Stox2	593.812	1.29003	0.315975	4.08271	4.45143e-05	0.00103735
Fmn1	653.713	1.43962	0.352659	4.08219	4.46128e-05	0.00103805
Cep44	495.745	-1.30263	0.319212	-4.08078	4.48856e-05	0.00104249
Gm10925	69.4295	1.31857	0.323141	4.08049	4.49407e-05	0.00104249
Ube2o	436.047	1.66886	0.409214	4.0782	4.53862e-05	0.00105122
Vangl1	189.352	1.32068	0.324097	4.07496	4.60219e-05	0.00106432
Gzma	71.8589	-2.75047	0.675215	-4.07348	4.63163e-05	0.00106675
Smarcc2	490.142	1.79722	0.441197	4.07352	4.63078e-05	0.00106675
Stk10	187.442	1.69983	0.417383	4.07259	4.64923e-05	0.00106708
2700049A03Rik	117.996	1.80993	0.444399	4.07276	4.64598e-05	0.00106708
Caskin2	184.192	2.3698	0.582052	4.07145	4.67209e-05	0.00107071
Pum1	410.869	1.52342	0.374566	4.06715	4.75907e-05	0.00108818
Arhgap23	192.827	2.07609	0.510475	4.06698	4.76265e-05	0.00108818
Prkd2	152.434	1.32976	0.327021	4.06627	4.77716e-05	0.00108985
Stil	106.285	1.62618	0.400615	4.05921	4.924e-05	0.00112167
Ptpn21	217.275	1.66964	0.411462	4.05782	4.95329e-05	0.00112665
Zc3h4	348.803	2.36032	0.581788	4.057	4.97064e-05	0.00112891
Mast3	244.627	1.49186	0.367787	4.05632	4.98515e-05	0.00113051
Jmy	262.172	1.53034	0.377393	4.05502	5.01303e-05	0.00113514
Foxk1	204.977	1.94909	0.480766	4.05414	5.0319e-05	0.00113772
Slfn2	832.963	-1.93609	0.477912	-4.05114	5.09689e-05	0.0011507
Midn	849.444	1.71935	0.424593	4.04941	5.13459e-05	0.00115749
Polq	77.9307	1.89334	0.467688	4.0483	5.15899e-05	0.00115996
Heatr1	488.839	1.19253	0.294582	4.04822	5.1608e-05	0.00115996
Chd6	229.567	1.78036	0.439875	4.04741	5.17877e-05	0.00116228
Gm6767	109.165	-1.12989	0.279194	-4.04698	5.18826e-05	0.00116269
Eif4ebp2	1510.99	1.97314	0.48789	4.04423	5.24952e-05	0.00116952
Ube2l6	2633.18	-1.85722	0.459209	-4.04439	5.24603e-05	0.00116952
Plekhg2	134.372	2.38256	0.589105	4.04438	5.24622e-05	0.00116952
Fndc1	26.9432	3.35965	0.83059	4.0449	5.23458e-05	0.00116952
Nup188	550.523	1.87244	0.46307	4.04353	5.2653e-05	0.00117132
Med13l	135.931	2.38897	0.59107	4.04177	5.30488e-05	0.0011784
Zfp518b	140.892	1.71572	0.424609	4.04071	5.32887e-05	0.001182
Ms4a4b	68.3442	-2.40009	0.594192	-4.03925	5.36216e-05	0.00118765
Fam160b1	477.326	1.15747	0.286674	4.0376	5.4002e-05	0.00119433
Rpl13	20499.4	-1.05758	0.262063	-4.03559	5.44648e-05	0.00120282
Birc6	408.888	2.28409	0.566261	4.03362	5.49231e-05	0.00121115
Insl6	112.848	-2.07414	0.514254	-4.03329	5.50015e-05	0.00121115
Tacc1	891.657	1.50076	0.372154	4.03263	5.51551e-05	0.00121277
Sart3	558.05	1.67455	0.415331	4.03184	5.53422e-05	0.00121513
Tgfb3	258.107	1.37635	0.341495	4.03039	5.56853e-05	0.00121914
Ganc	1401.12	1.09512	0.271697	4.03066	5.56195e-05	0.00121914
Abtb2	283.015	1.86127	0.461891	4.02967	5.58557e-05	0.00122111
Arhgap21	392.268	1.89951	0.471494	4.02871	5.60842e-05	0.00122434
Col12a1	182.353	2.61094	0.648176	4.02814	5.62207e-05	0.00122556
Etv1	146.471	1.28428	0.319008	4.02586	5.67685e-05	0.00123142
Crebbp	191.077	1.79309	0.445397	4.02583	5.67742e-05	0.00123142
Aif1	278.167	-1.79563	0.446049	-4.02562	5.68244e-05	0.00123142
Zbtb7a	395.786	1.70915	0.424533	4.02594	5.6748e-05	0.00123142
Iars	900.925	1.37259	0.340988	4.02533	5.68947e-05	0.00123142
Trim62	171.631	2.4153	0.600409	4.02275	5.75215e-05	0.00124322
Snhg12	732.818	-1.56843	0.389938	-4.02225	5.76459e-05	0.00124414
Setdb1	346.216	1.37137	0.341009	4.0215	5.78285e-05	0.00124631
Trip11	259.814	1.9453	0.483973	4.01944	5.83366e-05	0.00124952
Cpt1a	334.157	1.99057	0.495161	4.02005	5.81854e-05	0.00124952
Elmsan1	282.598	2.04561	0.508956	4.01923	5.83887e-05	0.00124952
Htra2	2254.29	-1.22037	0.303591	-4.01979	5.8249e-05	0.00124952
Zbtb34	80.5635	1.98599	0.493959	4.02056	5.80599e-05	0.00124952
Farp1	277.03	1.72263	0.428773	4.01758	5.87994e-05	0.00125654
Sec24b	497.207	1.77724	0.442714	4.01442	5.95918e-05	0.00126756
Fmnl2	452.274	1.42508	0.354962	4.01475	5.95098e-05	0.00126756
Mmrn2	71.6603	1.82858	0.455441	4.01497	5.9453e-05	0.00126756
Agap1	420.574	1.7745	0.442055	4.0142	5.96487e-05	0.00126756
Aspm	189.753	2.09574	0.522332	4.01227	6.01369e-05	0.00127615
Atr	150.488	1.45122	0.361778	4.01134	6.03759e-05	0.00127943
Dclk1	681.656	1.47388	0.367499	4.01056	6.05759e-05	0.00128188
Cd9	1440.98	-1.35151	0.33706	-4.00971	6.07936e-05	0.0012847
Tram2	187.349	1.92163	0.479506	4.00753	6.13574e-05	0.00129481
Ski	624.279	2.20474	0.550314	4.00634	6.16668e-05	0.00129953
Flnb	261.12	2.2056	0.550613	4.00572	6.18296e-05	0.00130039
Zfp568	163.428	1.34181	0.334989	4.00553	6.18787e-05	0.00130039
Afap1	166.679	2.01402	0.502899	4.00483	6.20618e-05	0.00130244
Tmem94	340.756	2.17381	0.543023	4.00316	6.2502e-05	0.00130743
Sh3d19	115.677	1.83509	0.45837	4.00351	6.24089e-05	0.00130743
Tecpr1	4576.97	1.63354	0.408084	4.00295	6.25575e-05	0.00130743
Arhgdib	15335.4	-1.02614	0.256452	-4.00128	6.29999e-05	0.00131126
Whrn	138.906	1.76631	0.441421	4.00143	6.29611e-05	0.00131126
Zfp532	195.47	1.51762	0.379224	4.0019	6.28372e-05	0.00131126
Arntl	123.133	1.39816	0.349473	4.00078	6.31352e-05	0.00131228
Mroh1	694.163	1.63676	0.409156	4.00033	6.32534e-05	0.00131274
Akap13	143.482	2.37233	0.593077	4.00005	6.33303e-05	0.00131274
Shank3	20.5993	3.59432	0.899024	3.99803	6.38724e-05	0.00132038
Klf13	210.539	1.85052	0.46284	3.99818	6.38305e-05	0.00132038
Atp2b4	26.25	2.29428	0.573943	3.9974	6.40419e-05	0.00132208
Pprc1	373.142	1.92165	0.480915	3.99583	6.4467e-05	0.00132905
Eme2	51.0424	1.39857	0.350124	3.99448	6.48357e-05	0.00133484
Tjp1	346.822	2.12692	0.532798	3.99198	6.55228e-05	0.00134716
Plxnb2	2222.33	1.57578	0.395047	3.98884	6.63984e-05	0.00136148
Pdk2	122.738	1.98113	0.496662	3.9889	6.63811e-05	0.00136148
Rprd2	276.029	1.57184	0.394166	3.98776	6.66995e-05	0.00136581
Lama2	30.2589	2.17618	0.545946	3.98607	6.71766e-05	0.00137373
Cobll1	249.962	2.42241	0.607988	3.9843	6.76796e-05	0.00138216
Cnot3	383.308	1.76123	0.44208	3.98396	6.77776e-05	0.0013823
Fxyd3	81.4491	-2.10156	0.527563	-3.98352	6.79015e-05	0.00138297
Phc3	199.535	1.60374	0.402709	3.98239	6.82266e-05	0.00138773
Ube3b	742.009	1.97389	0.49603	3.97938	6.90965e-05	0.00140355
Gak	668.711	1.30918	0.329313	3.97548	7.02373e-05	0.00142481
Dhx57	154.163	1.91395	0.481662	3.97364	7.07822e-05	0.00143395
Setd1a	134.801	1.80253	0.453761	3.97243	7.11434e-05	0.00143935
Atp9b	350.413	1.13732	0.286358	3.97169	7.13634e-05	0.00144188
Mitd1	807.657	-1.10529	0.278343	-3.97097	7.15794e-05	0.00144433
Rragd	453.433	1.0964	0.276265	3.96867	7.22739e-05	0.00145641
Hs6st1	223.517	1.54373	0.389361	3.96477	7.34666e-05	0.00147748
Rbbp6	543.429	1.42051	0.358472	3.96267	7.41154e-05	0.00148515
Smad3	216.999	2.12491	0.536306	3.96212	7.42868e-05	0.00148515
Spred2	353.448	1.75862	0.443771	3.9629	7.40433e-05	0.00148515
9930021J03Rik	87.1216	2.08471	0.526157	3.96214	7.42814e-05	0.00148515
Als2	602.319	1.05105	0.265331	3.96128	7.45496e-05	0.00148845
Ptprj	302.72	1.68081	0.424604	3.95854	7.54089e-05	0.00150363
Tns1	110.248	2.29011	0.578667	3.95756	7.57183e-05	0.00150782
Xpr1	271.415	1.49523	0.377882	3.95687	7.59385e-05	0.0015083
Bub1b	895.508	1.31337	0.332163	3.95398	7.68609e-05	0.00152458
Ago2	1901.53	1.85808	0.470055	3.9529	7.72086e-05	0.00152603
Mbp	2046.55	-1.27898	0.323561	-3.95282	7.72358e-05	0.00152603
Vamp5	970.827	-1.38873	0.351275	-3.95341	7.70466e-05	0.00152603
Col14a1	86.4879	2.04448	0.517332	3.95196	7.7513e-05	0.00152782
Tmem164	400.575	1.28068	0.324066	3.95192	7.75275e-05	0.00152782
Gzmd	22.1238	-3.99112	1.01022	-3.95072	7.79155e-05	0.00153348
Rcor1	508.965	1.92693	0.487832	3.94999	7.81554e-05	0.00153621
Tbc1d4	243.172	1.51593	0.384069	3.94703	7.9127e-05	0.0015533
Capg	4031.03	-1.00027	0.253681	-3.94303	8.04599e-05	0.00157743
Heg1	100.212	2.34009	0.593678	3.94167	8.09158e-05	0.00158432
Morc2a	559.068	1.12136	0.284652	3.9394	8.16848e-05	0.00159732
Mmp9	58.5674	2.25979	0.573854	3.93791	8.21945e-05	0.00160522
Efl1	305.852	1.02911	0.261438	3.93633	8.27376e-05	0.00161376
2610001J05Rik	1003.1	-1.13724	0.288936	-3.93595	8.28697e-05	0.00161426
Myo18a	294.472	2.4146	0.613521	3.93564	8.29761e-05	0.00161426
1700003F12Rik	662.038	-1.8009	0.458017	-3.93196	8.42576e-05	0.00163514
Purb	1339.41	1.54851	0.393829	3.93194	8.42647e-05	0.00163514
Dock1	617.476	1.83287	0.466192	3.93158	8.43899e-05	0.00163549
Edc4	428.82	1.35257	0.344166	3.92999	8.49501e-05	0.00164215
Ptpn11	1006.94	1.29047	0.328471	3.92871	8.54022e-05	0.00164879
Phka1	149.326	1.46099	0.37193	3.92813	8.56101e-05	0.00165071
Slc25a23	337.867	1.5839	0.403252	3.92782	8.57188e-05	0.00165071
Nppb	933.542	-1.73462	0.441706	-3.9271	8.59756e-05	0.00165356
Polr3a	139.407	1.55592	0.396346	3.92566	8.64907e-05	0.00166136
1700086P04Rik	29.2064	-2.10637	0.536632	-3.92517	8.66674e-05	0.00166266
Zfp292	134.103	1.96957	0.501926	3.92402	8.70845e-05	0.00166855
Dido1	378.8	1.43527	0.36593	3.92224	8.77287e-05	0.00167667
Nmi	887.81	-1.20107	0.306374	-3.92027	8.84508e-05	0.00168834
Tarsl2	55.3342	1.88451	0.480765	3.91981	8.86175e-05	0.0016894
Ripor1	230.409	1.82638	0.466111	3.91834	8.91599e-05	0.00169761
Pigb	115.986	1.44688	0.369467	3.91614	8.99783e-05	0.00170891
Dcaf7	1435.95	1.68009	0.429133	3.91509	9.03722e-05	0.00171393
Apol9b	775.054	-2.42809	0.620229	-3.91483	9.04681e-05	0.00171393
Papln	40.5335	2.77446	0.708941	3.91354	9.09546e-05	0.00171886
Fam53b	3287.99	1.54437	0.394662	3.91314	9.11029e-05	0.00171953
Rin3	470.247	2.08578	0.533136	3.91229	9.14261e-05	0.00172135
Usp47	738.796	1.72351	0.440533	3.91233	9.14103e-05	0.00172135
Dennd2d	81.2912	-1.90575	0.487425	-3.90983	9.23592e-05	0.00173677
Hnrnpul2	864.445	1.99879	0.511292	3.9093	9.25648e-05	0.00173848
Rnf44	348.951	1.98855	0.508799	3.90832	9.2942e-05	0.00174341
Plxnd1	1148.21	2.08822	0.534358	3.90791	9.30972e-05	0.00174417
Atp11a	1143.82	1.5463	0.39583	3.90647	9.36541e-05	0.00175074
Mllt6	357.094	1.71781	0.439742	3.90641	9.36783e-05	0.00175074
Slamf9	210.044	-2.25936	0.578578	-3.90503	9.42124e-05	0.00175855
Son	1655.46	1.36262	0.349064	3.90363	9.47597e-05	0.00176601
Gstm4	123.56	-1.0492	0.26879	-3.90342	9.4844e-05	0.00176601
Sympk	2125.12	1.53906	0.394422	3.90205	9.538e-05	0.00177381
Scaf1	805.634	1.80212	0.461922	3.90134	9.56599e-05	0.00177684
Sf3a1	2495.11	1.1086	0.284423	3.89772	9.71043e-05	0.00180147
Cd48	115.891	-1.88803	0.484579	-3.89622	9.77046e-05	0.00180714
Ralgapa1	184.022	1.56131	0.40074	3.89607	9.77671e-05	0.00180714
Eif3h	15515.2	-1.37942	0.354029	-3.89635	9.76542e-05	0.00180714
Mtr	151.739	1.40603	0.36107	3.89406	9.858e-05	0.00181996
Etl4	79.0919	1.76336	0.453596	3.88752	0.000101274	0.00186743
Fam160b2	127.466	1.63804	0.42163	3.88501	0.000102324	0.00188316
Pkd2	191.982	1.53786	0.395857	3.88489	0.000102375	0.00188316
Fgd1	67.4439	1.49196	0.384134	3.88395	0.000102772	0.00188817
Isg15	1064.6	-1.91655	0.493536	-3.8833	0.000103048	0.00189095
Kdm5c	439.683	1.74274	0.449092	3.88059	0.000104204	0.00190987
Ccl8	851.949	-1.78921	0.461418	-3.87763	0.000105479	0.0019309
Zmynd8	718.267	1.64751	0.425042	3.87611	0.000106138	0.00193829
Gtf2i	3228.03	1.07276	0.276828	3.8752	0.000106538	0.00194327
Hivep1	54.7755	2.54354	0.656741	3.87297	0.000107517	0.00195877
Abca1	104.096	2.05205	0.530164	3.8706	0.000108567	0.00196612
Ckap5	1010.99	1.66977	0.431353	3.871	0.00010839	0.00196612
Specc1	608.769	1.32814	0.343113	3.87085	0.000108457	0.00196612
Phldb1	716.408	1.23637	0.319401	3.87089	0.000108437	0.00196612
Tug1	802.077	1.38525	0.357793	3.87164	0.000108104	0.00196612
Safb2	382.876	2.05505	0.531024	3.86997	0.000108849	0.00196886
Eif2ak4	214.071	1.18271	0.305687	3.86901	0.000109277	0.00197208
Ampd3	93.3351	2.07008	0.535123	3.86841	0.000109545	0.00197208
Trim2	173.055	1.26362	0.326639	3.86854	0.000109487	0.00197208
Pbrm1	368.213	1.57394	0.406869	3.86843	0.00010954	0.00197208
Batf3	45.6517	-1.71726	0.444011	-3.86762	0.000109905	0.00197621
Oas1c	53.6717	-1.70539	0.441106	-3.86617	0.000110558	0.00198326
Fam222b	159.315	1.92838	0.498779	3.86621	0.00011054	0.00198326
Cd2	73.6696	-1.98961	0.514706	-3.86554	0.000110846	0.00198607
Zfp106	1115.34	1.61227	0.417189	3.86461	0.000111269	0.0019913
Fbln2	293.976	2.43188	0.62946	3.86343	0.000111805	0.00199854
Dcp1a	172.001	1.29413	0.335293	3.85969	0.000113532	0.00202702
Tnf	25.5292	-2.51962	0.652962	-3.85876	0.000113964	0.00203236
Rpl32	53634.8	-1.5569	0.403535	-3.85815	0.000114249	0.00203505
Srrm1	1044.93	1.58878	0.412056	3.85574	0.000115379	0.00205278
Nfatc3	378.937	1.48867	0.386188	3.85479	0.000115829	0.00205838
Abca3	173.245	2.34645	0.608801	3.85421	0.000116104	0.00206085
Marf1	398.519	1.12887	0.292946	3.85351	0.000116434	0.00206429
Cenph	334.224	-1.00448	0.260724	-3.85268	0.000116833	0.00206895
Gsk3b	725.366	1.7489	0.454202	3.85048	0.000117889	0.00208522
Camta2	216.816	2.08025	0.540328	3.84997	0.000118131	0.00208603
Clec7a	416.306	-2.23608	0.580828	-3.84981	0.000118209	0.00208603
Ifitm3	6238.87	-1.64104	0.426347	-3.84908	0.000118563	0.00208743
Nfia	324.431	1.84156	0.47842	3.84925	0.00011848	0.00208743
Snx10	1771.87	-1.7631	0.458429	-3.84595	0.000120085	0.00211048
Gm7266	1027.62	-1.63556	0.425282	-3.84582	0.00012015	0.00211048
Gzme	17.9618	-3.11248	0.809386	-3.84548	0.000120316	0.00211094
Elk4	234.907	1.55878	0.405536	3.84375	0.000121169	0.00212102
Fam102a	186.276	1.62636	0.423109	3.84382	0.000121133	0.00212102
E330034G19Rik	107.715	-1.40469	0.365506	-3.84312	0.000121479	0.00212156
Myh11	17.8952	4.64348	1.20859	3.84205	0.000122011	0.0021284
Pcsk5	22.3207	2.93345	0.763897	3.84012	0.000122975	0.00214276
Orc6	1211.59	-1.14718	0.298774	-3.83963	0.000123221	0.00214458
Atad2b	179.538	1.79972	0.468776	3.8392	0.000123438	0.0021459
Ahsg	17.0117	-3.30878	0.862003	-3.83848	0.000123799	0.00214972
Mamld1	30.6634	2.42644	0.632453	3.83655	0.000124774	0.00216417
Xpo4	282.805	1.16792	0.304735	3.83257	0.000126812	0.00219701
Cd247	42.8127	-2.11426	0.551864	-3.83112	0.000127562	0.00220748
Kank2	330.328	1.39586	0.36458	3.82869	0.000128828	0.00222687
Ambra1	434.903	1.48334	0.387471	3.82825	0.000129057	0.00222828
Hk2	1135.43	1.72218	0.450532	3.82255	0.00013208	0.00227789
Pdcd11	397.738	1.85544	0.48564	3.82061	0.000133124	0.0022933
Cabin1	382.166	1.82155	0.47691	3.81948	0.000133734	0.00230119
Cth	273.994	-1.14773	0.300558	-3.81865	0.000134184	0.00230142
Zfp703	148.761	1.89776	0.496977	3.81862	0.000134201	0.00230142
Gm49338	27.3178	3.13943	0.822042	3.81906	0.000133959	0.00230142
Cltc	5510.3	1.44638	0.378822	3.81809	0.000134488	0.00230374
Dnmbp	80.2032	2.00774	0.525993	3.81704	0.00013506	0.00231054
Psme4	773.42	1.32407	0.346905	3.81681	0.000135189	0.00231054
Map4k2	102.676	1.02108	0.267588	3.81587	0.000135703	0.00231672
Psmb10	3639.15	-1.38128	0.362081	-3.81483	0.000136275	0.00232387
Akap9	221.181	2.51204	0.658701	3.81363	0.000136939	0.00233257
Rev3l	120.689	1.96058	0.514473	3.81085	0.000138488	0.00235104
Smtn	346.044	1.54322	0.404925	3.81114	0.00013833	0.00235104
Acvr1	637.341	1.12073	0.294074	3.81105	0.000138376	0.00235104
Ptpn18	1028.42	-2.01204	0.528062	-3.81023	0.000138835	0.0023543
Rgp1	335.502	1.58857	0.417338	3.80644	0.00014098	0.00238535
Adam17	803.476	1.07098	0.281344	3.80665	0.00014086	0.00238535
Stk35	168.208	1.39659	0.366958	3.80587	0.000141304	0.00238819
Smg7	779.918	1.44888	0.380772	3.80511	0.00014174	0.00239288
Larp1	1302.47	2.06206	0.542276	3.80261	0.000143181	0.00241454
Mtss1l	292.95	1.81666	0.477905	3.8013	0.000143938	0.00242192
mt-Nd1	30314.3	1.49575	0.393474	3.80139	0.000143887	0.00242192
Tle3	496.02	1.92329	0.506088	3.80031	0.000144514	0.00242893
Nfatc1	77.1062	1.65048	0.434384	3.79959	0.000144935	0.00242912
Uhrf1bp1	222.997	1.93895	0.510379	3.79904	0.000145255	0.00242912
Sall2	202.059	1.60104	0.421341	3.79987	0.000144771	0.00242912
Fancm	127.5	1.38647	0.364916	3.79943	0.000145027	0.00242912
Gm15710	186.613	-1.19937	0.315714	-3.79892	0.000145325	0.00242912
Zkscan1	346.447	1.16737	0.307416	3.79737	0.000146241	0.0024391
Gm12174	34.9548	-1.71213	0.450875	-3.79736	0.000146243	0.0024391
Sbf2	653.716	1.61689	0.425844	3.79691	0.000146511	0.00244058
Ppp1r10	394.803	1.43941	0.379125	3.79667	0.000146653	0.00244058
Mkl1	270.699	1.61256	0.424822	3.79585	0.000147135	0.00244593
Eea1	140.286	1.77247	0.46708	3.79479	0.000147771	0.00245381
Oas1g	286.545	-1.70889	0.450377	-3.79436	0.000148023	0.00245531
Tjp2	880.612	1.48739	0.392065	3.79372	0.000148405	0.00245896
Zfp526	56.2107	1.82222	0.480452	3.79272	0.000149003	0.00246618
Itpr1	411.849	1.74379	0.459856	3.79205	0.000149412	0.00247025
Kntc1	239.632	1.70621	0.450233	3.78962	0.000150878	0.0024908
Plekhg3	424.448	1.28683	0.339582	3.78945	0.000150983	0.0024908
Ltbp4	78.5015	2.65539	0.701071	3.78762	0.000152096	0.00250644
Mical2	59.2024	2.86378	0.756158	3.78728	0.000152306	0.00250719
Usf3	171.904	2.41683	0.638194	3.78698	0.000152489	0.00250748
6330403L08Rik	31.8887	2.10812	0.556896	3.78548	0.000153409	0.00251717
Gm46496	185.865	-1.63864	0.432861	-3.78559	0.000153342	0.00251717
Iffo2	300.382	1.6157	0.426873	3.78496	0.000153735	0.00251979
Mex3a	430.47	1.64932	0.435914	3.78358	0.000154587	0.00253103
Sltm	339.181	2.1986	0.581315	3.78211	0.000155507	0.00254327
Aifm1	571.68	1.40437	0.371371	3.78158	0.000155837	0.00254327
Cplane1	83.8858	2.0312	0.537109	3.78172	0.000155748	0.00254327
Wdr62	124.632	1.70961	0.452292	3.77989	0.000156897	0.0025532
Sp2	183.106	1.52432	0.40343	3.77839	0.000157844	0.00256501
Atn1	82.6177	2.36994	0.627305	3.77797	0.000158112	0.00256661
Phf7	153.734	-1.06395	0.281683	-3.77712	0.000158652	0.00257264
Gxylt1	169.322	1.61273	0.427067	3.77629	0.000159185	0.00257852
Tacc2	97.6588	1.81678	0.481159	3.77585	0.000159464	0.0025803
Mrc2	82.643	2.55389	0.676636	3.77439	0.000160402	0.00259272
Gm20619	44.9499	-2.56424	0.679442	-3.77405	0.00016062	0.00259348
Ppp1r13l	107.478	2.05444	0.544758	3.77129	0.000162404	0.00261672
Snapc4	159.795	1.4463	0.383626	3.77007	0.000163203	0.00262681
Eif3e	7917.56	-1.10729	0.293759	-3.76937	0.000163659	0.00262909
Gng11	1247.54	-1.82704	0.484714	-3.76932	0.000163691	0.00262909
Wdr7	264.883	1.41443	0.375437	3.76742	0.000164946	0.00264365
Lpp	182.676	2.20055	0.584193	3.76681	0.000165345	0.00264447
Arhgef11	567.178	2.13632	0.567118	3.76697	0.000165241	0.00264447
Cenpf	248.67	2.06967	0.549679	3.76523	0.000166394	0.00265845
Ralgapa2	149.688	1.87771	0.49894	3.76339	0.000167623	0.00267248
Rmnd5a	365.563	1.25859	0.334467	3.76296	0.000167914	0.00267358
Fkbp11	1232.52	-1.57599	0.418843	-3.76273	0.00016807	0.00267358
Lama5	79.6562	2.48846	0.661429	3.76224	0.000168397	0.00267358
Dync1h1	1620.68	1.96345	0.521872	3.76233	0.000168336	0.00267358
Il1b	51.604	-2.25591	0.599709	-3.76167	0.000168782	0.0026769
Frmd6	167.044	1.52059	0.404309	3.76095	0.000169267	0.00268179
Trim33	220.863	1.63345	0.434579	3.75868	0.000170809	0.0027034
Crybg3	93.3262	1.6443	0.437761	3.75615	0.000172544	0.00272803
Dock6	176.877	1.77501	0.47298	3.75282	0.000174856	0.00276171
Med23	267.816	1.50101	0.400211	3.75054	0.000176457	0.0027618
Tmem132a	245.422	1.40822	0.375313	3.75212	0.000175343	0.0027618
Ahctf1	416.064	1.56723	0.417874	3.75048	0.000176498	0.0027618
Gins4	1508.79	-1.10198	0.293753	-3.75139	0.000175857	0.0027618
Plekhm1	794.648	1.61606	0.430741	3.7518	0.000175567	0.0027618
Myo9a	73.7696	2.35522	0.627932	3.75075	0.000176305	0.0027618
Dock3	115.054	2.16603	0.577431	3.75116	0.00017602	0.0027618
Taok1	476.893	1.60609	0.428432	3.74877	0.000177705	0.00277783
Pola1	246.317	1.5434	0.411831	3.74767	0.000178488	0.0027872
Usp31	168.563	1.9454	0.519177	3.74708	0.000178907	0.00279088
Gpr161	69.7192	2.23866	0.597923	3.74406	0.000181071	0.00282173
1810044D09Rik	61.0128	-1.72212	0.460018	-3.74359	0.000181406	0.00282406
Slc25a35	131.403	1.16679	0.311715	3.74312	0.000181753	0.00282656
Atxn2l	1141.78	1.7491	0.467383	3.74232	0.000182326	0.00282798
Tbc1d16	565.421	1.49059	0.398325	3.74214	0.000182461	0.00282798
Cd53	522.229	-1.75694	0.469524	-3.74196	0.000182588	0.00282798
Zfp469	29.1676	3.61027	0.96519	3.74048	0.000183668	0.0028418
Zfp652	210.721	1.57707	0.421682	3.73995	0.000184054	0.00284489
Ifi35	1308.15	-1.51276	0.404527	-3.73956	0.00018434	0.0028464
Nfix	146.867	2.42681	0.64909	3.73878	0.000184913	0.00284946
Il6st	667.898	1.12163	0.299986	3.73894	0.000184799	0.00284946
Lman2l	573.229	1.10749	0.296299	3.73773	0.000185687	0.00285355
Ppp1r13b	277.761	1.45031	0.388053	3.7374	0.000185929	0.00285355
Setd7	428.122	1.38638	0.370931	3.73757	0.00018581	0.00285355
mt-Nd5	8392.68	2.2503	0.60199	3.73811	0.000185412	0.00285355
Rad51ap1	623.383	-1.07164	0.286765	-3.73699	0.000186234	0.00285534
Notch2	135.638	2.37314	0.635333	3.73527	0.000187514	0.00287207
Dnajc16	325.442	1.4277	0.38228	3.7347	0.000187939	0.00287568
Fam136a	3249.67	-1.48007	0.396386	-3.73391	0.00018853	0.00288182
Pole	212.288	1.38585	0.371345	3.73198	0.000189977	0.0028952
Thbs2	269.31	2.41548	0.647234	3.73201	0.000189959	0.0028952
Slit3	46.1442	3.29093	0.881996	3.73123	0.000190549	0.00290101
Ccr1	229.427	-1.4753	0.395474	-3.73047	0.00019112	0.00290454
Pogz	232.919	1.76018	0.471846	3.73042	0.000191164	0.00290454
Zfp827	130.784	1.90433	0.510587	3.72968	0.000191721	0.0029101
Cercam	58.5245	1.38643	0.371807	3.72889	0.000192322	0.00291631
Tmod1	393.69	1.50503	0.403767	3.72747	0.000193409	0.00292696
Sema7a	527.253	1.23648	0.331774	3.72686	0.000193881	0.00292826
Srgap1	38.5348	3.16023	0.848757	3.72336	0.000196591	0.00296037
Uhmk1	590.521	1.71967	0.461839	3.72352	0.000196462	0.00296037
Ttc17	296.917	1.10677	0.29722	3.72374	0.00019629	0.00296037
Smc1a	506.298	1.84857	0.496559	3.72276	0.000197055	0.00296442
Mrpl19	2203.88	-1.03491	0.27807	-3.72176	0.00019784	0.00297327
Nrcam	2344.21	1.32578	0.356345	3.72049	0.000198834	0.00298526
Itsn1	699.265	1.37465	0.369709	3.71819	0.000200652	0.00300662
Eef1akmt4	217.544	-1.47306	0.396166	-3.71828	0.000200582	0.00300662
Arhgef5	55.3734	2.0583	0.553643	3.71774	0.000201014	0.00300907
Nfe2l1	1696.83	1.34686	0.36257	3.71475	0.000203403	0.00304184
Cep350	134.726	2.37522	0.639454	3.71445	0.000203648	0.0030425
Ccdc6	354.157	1.7094	0.460238	3.71416	0.000203876	0.00304292
M6pr	5361.74	-1.15684	0.311489	-3.71391	0.000204078	0.00304294
Six1	182.926	1.28684	0.346526	3.71355	0.000204374	0.00304437
Apbb2	137.055	2.08004	0.560384	3.71182	0.000205778	0.00306228
Cd300c2	162.994	-1.78214	0.480205	-3.71121	0.000206272	0.00306663
Rab11fip4	237.461	1.62604	0.438455	3.70857	0.000208429	0.00309265
Zfp316	162.72	1.60952	0.433987	3.70867	0.000208348	0.00309265
Adamts2	124.007	2.18233	0.588641	3.7074	0.000209399	0.00310401
Wwc1	141.958	1.74475	0.470654	3.70708	0.00020966	0.00310484
Pde11a	324.453	1.79749	0.485174	3.70483	0.000211534	0.00312956
Thsd7a	91.795	1.59258	0.430074	3.70304	0.000213028	0.00314552
Cux1	691.553	1.44527	0.390458	3.70147	0.000214356	0.00316206
Glipr2	637.222	-1.21939	0.329613	-3.69947	0.000216048	0.0031747
Ercc6	74.7023	1.77853	0.480717	3.69974	0.000215822	0.0031747
Gm19705	51.8016	-2.04598	0.552971	-3.69998	0.000215618	0.0031747
Gsdmc	2655.72	-1.37285	0.371212	-3.6983	0.000217049	0.00318632
Dnase1l1	176.032	-1.07771	0.291708	-3.6945	0.000220319	0.00322809
5430416N02Rik	59.0674	-1.22098	0.330478	-3.69458	0.000220253	0.00322809
Gm9732	16.7774	-3.61178	0.977797	-3.69379	0.000220938	0.00323092
Crim1	182.335	2.12309	0.575062	3.69194	0.000222554	0.0032483
Tceal9	2225.33	-1.03169	0.279445	-3.69194	0.000222549	0.0032483
Fam83h	96.5591	1.44247	0.390874	3.69038	0.000223916	0.00326505
Akap12	72.0831	2.37455	0.643635	3.68927	0.000224896	0.00327619
Card6	141.015	1.3619	0.369243	3.68836	0.000225703	0.00328166
Vps53	970.643	1.12296	0.304527	3.68755	0.000226424	0.00328271
Gigyf1	159.71	1.62162	0.439731	3.68775	0.000226249	0.00328271
Eif4g1	6066.01	1.64714	0.446641	3.68783	0.000226174	0.00328271
Ank2	213.951	1.82939	0.496267	3.6863	0.000227537	0.0032957
Fbn1	290.863	2.3458	0.636703	3.6843	0.000229334	0.00331858
Gm6170	97.6465	-1.26763	0.344165	-3.68319	0.000230331	0.00332666
Ift140	153.197	1.28874	0.349983	3.68229	0.000231146	0.00333527
Rab3gap2	499.105	1.53381	0.416712	3.68074	0.000232555	0.00334799
Dzip1	220.925	1.54671	0.420198	3.6809	0.000232409	0.00334799
Fbrs	571.702	1.98121	0.538286	3.6806	0.000232689	0.00334799
Atp1a1	29628	1.53257	0.416481	3.6798	0.000233415	0.00335526
Sash1	316.099	1.5856	0.431049	3.67846	0.000234644	0.00336974
Ddr2	827.911	1.38767	0.37734	3.6775	0.000235531	0.00337291
Dennd5b	340.707	1.26839	0.344862	3.67798	0.000235091	0.00337291
Ankrd37	247.353	-1.81856	0.494485	-3.67769	0.000235355	0.00337291
Hmbox1	164.851	1.18584	0.322629	3.67556	0.000237327	0.00339543
Adamts12	57.9084	1.93611	0.526873	3.67473	0.000238105	0.00340336
Iqgap1	1690.18	1.4327	0.389913	3.67443	0.000238385	0.00340415
Usp18	416.878	-2.11488	0.575768	-3.67316	0.000239574	0.00341471
Hip1	640.568	1.40557	0.382649	3.67326	0.000239472	0.00341471
Zfp553	287.834	1.31291	0.35774	3.67	0.000242547	0.00345385
Dusp14	103.683	1.65788	0.451899	3.6687	0.000243791	0.00346507
Psd3	16.3295	2.83294	0.772162	3.66884	0.00024365	0.00346507
Hhipl1	275.777	1.90718	0.519906	3.66831	0.00024416	0.00346707
Anks1	598.835	1.50404	0.410112	3.66739	0.000245038	0.00347629
Robo4	84.6478	1.93448	0.527602	3.66654	0.000245851	0.00348458
Hk1	2610.79	1.8456	0.503478	3.66571	0.000246656	0.00349273
Mga	221.196	1.59862	0.436362	3.66351	0.000248787	0.00351962
Nbeal2	132.003	1.8755	0.512167	3.66189	0.00025036	0.00353858
Slc4a2	903.1	1.32936	0.363061	3.66155	0.000250696	0.00354003
Cd93	315.651	1.3689	0.373951	3.66064	0.000251583	0.00354926
Plekhh1	125.175	1.91218	0.522479	3.65983	0.000252383	0.00355724
Slc12a2	163.451	1.2956	0.354034	3.65953	0.000252675	0.00355806
Klrd1	33.4421	-2.91523	0.797218	-3.65676	0.000255428	0.00359349
Atp8a2	15.5082	-2.56989	0.70289	-3.65618	0.000256006	0.00359829
H2-DMb1	1501.86	-1.63552	0.447392	-3.65569	0.000256493	0.00360181
Tbck	208.872	1.22955	0.336442	3.65456	0.000257619	0.00361428
Wasf2	716.884	1.67347	0.457969	3.65411	0.000258073	0.00361731
Sap30	1804.01	-1.45904	0.399433	-3.65277	0.000259423	0.00362994
Golgb1	309.407	2.05054	0.561373	3.65271	0.000259484	0.00362994
Taok3	227.011	1.62579	0.445117	3.65251	0.000259691	0.00362994
Acacb	101.395	1.78918	0.489891	3.65219	0.00026001	0.00363106
Hyal1	182.72	1.82516	0.499877	3.65122	0.000260996	0.00363209
Ccl5	352.83	-1.91713	0.52503	-3.65147	0.000260739	0.00363209
Tmem8b	72.0228	1.8433	0.504852	3.65118	0.00026104	0.00363209
Ctif	63.5112	2.0825	0.570468	3.65052	0.000261714	0.00363814
Ahdc1	80.7597	2.95226	0.80888	3.64981	0.000262439	0.00364381
Lmx1b	108.321	2.21788	0.607697	3.64965	0.000262602	0.00364381
Grb10	80.3803	1.97552	0.541562	3.64782	0.00026447	0.00366639
Cmbl	490.447	-1.30095	0.356782	-3.64634	0.000265997	0.0036842
Tnks	252.361	1.85241	0.508128	3.64556	0.000266808	0.00369206
Abcc1	408.739	1.51971	0.416971	3.64463	0.000267773	0.00369532
Bace1	257.638	1.16378	0.319298	3.6448	0.000267603	0.00369532
Usp54	148.516	1.58421	0.434639	3.64489	0.000267511	0.00369532
Inppl1	794.953	1.16528	0.31979	3.64388	0.000268556	0.00370277
Nfat5	90.6589	2.28634	0.627546	3.64331	0.000269153	0.00370762
Zfp36l1	246.102	1.54709	0.42505	3.63978	0.000272874	0.00374543
Podxl	72.2482	1.60952	0.442204	3.63977	0.000272884	0.00374543
Aff1	218.072	2.07653	0.570495	3.63987	0.00027278	0.00374543
Rpl18a-ps1	42.8747	-1.52269	0.418331	-3.63993	0.000272716	0.00374543
Ern1	167.082	1.5515	0.426432	3.63833	0.000274413	0.00376303
Ulk2	196.724	1.51925	0.417744	3.6368	0.000276048	0.00378203
Zfp608	93.1472	2.00236	0.550676	3.63619	0.000276702	0.00378757
Aga	879.943	-1.09425	0.301053	-3.63474	0.000278257	0.00380543
Ikbkap	553.639	1.16888	0.321621	3.63434	0.00027869	0.00380793
Ttbk1	99.849	2.13214	0.586959	3.63251	0.000280676	0.00382818
Tnk2	432.496	2.0045	0.551801	3.63265	0.000280521	0.00382818
Ablim1	401.665	1.63965	0.451583	3.6309	0.000282435	0.00384871
Srgap2	464.739	1.15574	0.318381	3.63005	0.000283367	0.00385796
Uhrf1bp1l	394.137	1.16858	0.321955	3.62963	0.000283826	0.00386074
Myo1e	776.086	1.65685	0.45658	3.62882	0.000284718	0.00386596
Ece1	145.437	1.78122	0.490848	3.62886	0.000284675	0.00386596
Atrnl1	349.49	1.24561	0.343309	3.62825	0.000285348	0.00387105
Tnpo1	1075.06	1.17993	0.325509	3.62488	0.000289101	0.00391498
Ptprk	228.047	1.34891	0.372124	3.62489	0.000289089	0.00391498
Usp42	190.111	1.71598	0.473462	3.62434	0.000289702	0.00391962
Agl	567.213	1.57882	0.435688	3.62375	0.000290366	0.00392511
Eml6	22.5079	2.92453	0.807202	3.62305	0.000291153	0.00393225
Kank1	88.0693	1.39907	0.386289	3.62181	0.000292547	0.00394757
Arl6ip5	2390.17	-1.05423	0.291192	-3.62041	0.000294135	0.00396547
Klf12	23.306	2.09238	0.577998	3.62005	0.000294547	0.00396751
Antxr2	218.555	1.45391	0.401761	3.61884	0.00029593	0.00397908
Gnptab	658.814	1.05739	0.292178	3.61901	0.000295733	0.00397908
Heatr5a	209.511	1.42055	0.3926	3.61831	0.000296529	0.00398361
Rxra	548.244	1.58163	0.437209	3.61756	0.00029739	0.00399165
Immp2l	40.0061	-2.02516	0.55986	-3.61727	0.000297731	0.0039927
Leng8	276.863	1.43574	0.396962	3.61681	0.000298254	0.00399618
Mnt	395.656	1.68501	0.465923	3.6165	0.000298613	0.00399747
Rpl3	27016.7	-1.09237	0.302085	-3.6161	0.000299073	0.0040001
Zmym4	323.147	1.31314	0.363235	3.61512	0.000300211	0.0040118
Ctso	166.495	-1.90363	0.5267	-3.61427	0.000301199	0.00402146
Evc2	425.312	1.24657	0.344973	3.61353	0.000302055	0.00402935
Crtc1	160.935	1.77804	0.492356	3.61128	0.000304692	0.00405739
Hook1	19.1082	-2.84746	0.788619	-3.61069	0.00030538	0.004063
Tmem104	373.51	1.95131	0.540691	3.60892	0.000307479	0.00408734
Sidt2	783.672	1.67551	0.464464	3.6074	0.000309284	0.00410775
Cbr1	422.092	-1.00424	0.278455	-3.60646	0.000310404	0.00411902
Synm	20.0816	4.41991	1.22596	3.60528	0.000311822	0.00413423
Myo6	432.81	1.36243	0.377993	3.60437	0.000312915	0.0041451
Fam184b	43.1779	2.49739	0.693191	3.60274	0.000314876	0.00416686
Chd2	163.403	2.03015	0.563534	3.60253	0.000315129	0.00416686
Slc5a3	195.291	1.69567	0.470716	3.60233	0.00031538	0.00416686
Sub1	7840.98	-1.24193	0.344862	-3.60125	0.000316695	0.00418059
Itgav	1386.38	1.67735	0.465836	3.60072	0.000317338	0.00418544
Oas1a	822.94	-1.54601	0.429425	-3.60018	0.000318003	0.00419057
Sufu	197.351	1.78328	0.495461	3.59925	0.000319142	0.00420194
Clip1	385.194	1.69403	0.470717	3.59883	0.000319653	0.00420503
Nup98	702.795	1.40577	0.390758	3.59754	0.000321241	0.00422227
Gm42418	1831.82	-1.77403	0.493162	-3.59726	0.000321591	0.0042232
Dennd4b	186.936	1.69725	0.471884	3.59676	0.000322204	0.0042276
Nae1	1000.84	-1.0205	0.283777	-3.59613	0.000322986	0.00423149
Col4a5	96.6298	1.55338	0.432333	3.59301	0.000326882	0.00426693
Gns	2477.13	1.59044	0.442608	3.59335	0.000326456	0.00426693
Tm9sf4	636.506	1.37811	0.383554	3.59301	0.000326886	0.00426693
Gpx1	27614.5	-1.40599	0.391447	-3.59178	0.000328429	0.00427972
Nsd2	1261.38	1.08656	0.302591	3.59086	0.000329582	0.00429107
Bicra	46.5289	3.1071	0.865568	3.58967	0.000331096	0.00429972
Epb41l4aos	344.612	-1.69847	0.473125	-3.58989	0.000330821	0.00429972
Cnn2	2641.49	-1.00949	0.281415	-3.58721	0.00033424	0.00433684
Ogdh	5047.77	1.75327	0.488848	3.58654	0.000335098	0.00434073
Disp1	298.018	1.43595	0.400374	3.58653	0.000335111	0.00434073
Mfn2	947.297	1.56044	0.435192	3.58563	0.000336264	0.00435196
Rbm6	337.483	1.51533	0.423069	3.58175	0.000341301	0.00441339
Ino80d	219.646	1.70269	0.475553	3.58043	0.000343027	0.00443193
Acox1	992.48	1.22469	0.342122	3.57968	0.00034401	0.00443708
E2f3	232.997	1.10561	0.308887	3.57934	0.000344465	0.00443918
Cd83	208.122	-2.03663	0.569076	-3.57883	0.000345134	0.00444096
Qpct	45.3917	-1.69848	0.474596	-3.57879	0.000345187	0.00444096
4932438A13Rik	148.933	2.03603	0.568996	3.5783	0.000345841	0.00444518
Zbtb38	498.996	1.3247	0.370224	3.5781	0.0003461	0.00444518
Ccl7	448.666	-1.49881	0.418982	-3.57727	0.000347204	0.0044539
Slc7a8	132.071	2.45019	0.685049	3.57667	0.000348004	0.00445833
Dera	1925.54	-1.09177	0.30529	-3.57617	0.000348664	0.00446302
Olfml1	186.21	-1.4564	0.407388	-3.57497	0.000350266	0.00447975
Herc2	218.849	2.33647	0.653961	3.5728	0.000353181	0.00451323
Wasf1	449.42	1.34062	0.375271	3.57239	0.000353732	0.00451638
Clcn6	150.913	1.75312	0.49077	3.57218	0.000354022	0.00451638
Lemd3	160.269	1.23656	0.346193	3.57189	0.000354416	0.00451762
Myo5a	2399.77	1.36478	0.382139	3.57141	0.000355064	0.00452208
Madd	168.106	1.89956	0.531967	3.57083	0.000355855	0.00452836
Rock1	188.685	1.85758	0.520268	3.57044	0.000356388	0.00453135
Epb41	512.701	1.35176	0.378785	3.56867	0.000358797	0.0045573
Dpp8	890.682	1.09051	0.305594	3.5685	0.000359029	0.0045573
Nufip1	987.477	-1.11866	0.313683	-3.56623	0.000362159	0.00458936
S100a10	1854.57	-1.07042	0.300206	-3.5656	0.000363018	0.00459641
Slc12a7	693.811	1.52971	0.429536	3.56131	0.000369013	0.00465879
Usp9x	373.875	2.23455	0.627436	3.5614	0.000368879	0.00465879
Ccl2	572.509	-1.11073	0.312016	-3.55986	0.000371058	0.00467872
Myo1b	377.11	1.52859	0.429475	3.5592	0.000371984	0.0046865
Zfyve9	296.74	1.89821	0.533412	3.55862	0.000372813	0.00469306
Mrs2	1358.45	1.01117	0.284302	3.55667	0.000375589	0.00472409
Klrc1	27.3674	-3.03596	0.853731	-3.55611	0.000376387	0.00472631
Tcof1	631.785	1.49867	0.421556	3.55508	0.000377869	0.00474099
Sipa1l2	297.626	1.73537	0.488207	3.55459	0.00037857	0.00474587
Sdha	2757.38	1.52015	0.427825	3.55319	0.000380586	0.0047672
Rbm20	207.783	1.56445	0.440371	3.55257	0.000381483	0.0047745
Slc35e3	135.977	1.04285	0.293634	3.55153	0.000383	0.00478955
Rusc2	856.664	1.33865	0.3771	3.54986	0.000385434	0.00481602
Uaca	357.593	2.31909	0.65354	3.5485	0.00038743	0.00483698
Kif21a	255.208	1.92154	0.541938	3.54568	0.000391607	0.00488111
Scaf4	285.721	1.79092	0.505212	3.54488	0.000392791	0.00489186
Patl1	396.445	1.68202	0.474708	3.54328	0.000395185	0.00491765
Supt16	677.692	1.51995	0.429033	3.54273	0.000396003	0.00491976
Memo1	1521.27	-1.00346	0.283227	-3.54295	0.000395679	0.00491976
Eif2ak3	253.121	1.52783	0.431486	3.54085	0.000398843	0.00494009
Il15	75.77	-2.11449	0.597206	-3.54063	0.00039917	0.00494009
Synrg	289.204	1.79616	0.507309	3.54057	0.000399265	0.00494009
Ctnna1	1359.49	1.82161	0.514456	3.54084	0.000398848	0.00494009
Heatr5b	152.265	1.96052	0.553705	3.54072	0.00039903	0.00494009
Foxn3	205.379	1.55211	0.438534	3.53931	0.000401168	0.0049596
Cherp	542.669	1.42661	0.40316	3.53858	0.000402286	0.00496938
Wdr90	260.271	1.39663	0.394753	3.53799	0.000403188	0.00497647
Flrt3	42.1626	1.6377	0.46292	3.53776	0.000403534	0.0049767
Lmo7	146.094	1.48372	0.419504	3.53684	0.000404947	0.00498603
Pqlc1	527.56	-1.08751	0.307473	-3.53694	0.000404794	0.00498603
Zdhhc8	391.809	1.89218	0.535093	3.53617	0.000405978	0.00499468
Mier3	182.736	1.19522	0.338079	3.53532	0.000407281	0.00500666
Coro1a	948.87	-1.33145	0.376715	-3.53438	0.000408731	0.00501636
Tnrc6b	141.18	1.92538	0.544739	3.5345	0.00040854	0.00501636
Limch1	239.37	1.44366	0.408616	3.53304	0.000410809	0.00503518
Mpp2	318.807	1.83956	0.520791	3.53225	0.000412037	0.00504471
Nol6	605.539	1.76301	0.499272	3.53116	0.000413734	0.00506142
Cand2	273.658	1.59666	0.452639	3.52744	0.000419595	0.00512338
Gm7776	34.317	-1.77012	0.501835	-3.52731	0.000419811	0.00512338
Lox	503.514	1.76239	0.499791	3.52626	0.000421475	0.00513956
Trbc2	65.5531	-1.98957	0.564371	-3.52528	0.000423028	0.00515436
Mdga2	94.2338	1.35348	0.384062	3.52413	0.000424883	0.00517281
Wdtc1	443.463	1.67309	0.474876	3.52321	0.000426356	0.00518659
Cdh2	260.553	1.58475	0.449973	3.52188	0.000428501	0.00520435
Zfp335	72.824	2.3451	0.665962	3.52137	0.000429324	0.00521018
Cep170	391.193	1.66553	0.473034	3.52096	0.000429984	0.00521403
Itga3	55.4557	2.52249	0.716533	3.52041	0.000430872	0.00521682
Ssbp1	1534.16	-1.36295	0.387204	-3.51998	0.000431576	0.00522084
Cep128	159.987	1.66098	0.471905	3.51974	0.000431972	0.00522146
Zmiz2	785.209	2.08522	0.592556	3.51902	0.000433139	0.00523141
Itpripl2	448.139	1.26022	0.358208	3.51813	0.000434603	0.00524492
Bod1l	180.443	2.21288	0.629057	3.51777	0.000435185	0.00524778
Nhsl1	40.1582	2.38976	0.67947	3.5171	0.000436287	0.00525273
Palld	93.472	2.49813	0.710246	3.51727	0.000436012	0.00525273
Dchs1	23.2765	2.82119	0.802257	3.51657	0.000437162	0.00525909
Mavs	450.038	1.2717	0.361911	3.51383	0.000441692	0.0053052
Gm21188	21.6933	-2.12529	0.60492	-3.51335	0.000442495	0.00531064
Akna	126.816	2.02575	0.576672	3.51283	0.000443366	0.00531689
4930447F24Rik	186.485	-1.03317	0.294163	-3.51223	0.000444361	0.00532462
Arhgap11a	198.641	2.12532	0.605307	3.51115	0.000446181	0.00534222
Slc9b2	194.703	-1.3158	0.374797	-3.5107	0.000446932	0.0053442
Cxcl16	406.982	-1.49596	0.426239	-3.50968	0.000448652	0.00535914
Mycbp2	170.239	2.16365	0.616608	3.50896	0.000449864	0.00536939
Ncam1	123.475	1.70411	0.485726	3.50838	0.000450845	0.00537266
Ascc3	258.781	1.51038	0.430549	3.50802	0.000451456	0.00537572
Kif16b	269.297	1.70383	0.485726	3.50779	0.000451839	0.00537608
Rab39b	112.875	-1.57447	0.449019	-3.50647	0.000454086	0.00539857
Dennd5a	1386.41	1.24473	0.355153	3.50476	0.000457012	0.00542912
Gm13835	783.406	-1.15012	0.32823	-3.504	0.000458329	0.0054403
Gm14494	515.718	-1.94664	0.555837	-3.50217	0.000461486	0.00546518
Myo9b	441.637	1.48011	0.422709	3.50148	0.000462685	0.00547511
Nacc2	565.576	1.12567	0.321525	3.50103	0.000463462	0.00547732
Tmppe	51.4443	1.91164	0.546035	3.50096	0.000463593	0.00547732
Tulp2	125.208	-1.34798	0.385108	-3.50026	0.000464805	0.00548738
Ppp1r12a	438.779	1.52309	0.43517	3.5	0.000465256	0.00548843
Lyplal1	1178.24	-1.40979	0.402885	-3.49923	0.000466606	0.00549772
Gigyf2	488.405	1.30301	0.372428	3.4987	0.000467527	0.00550241
Efnb2	45.9771	1.79923	0.514427	3.49755	0.00046956	0.00552206
Pogk	596.784	1.22764	0.351104	3.49652	0.000471362	0.00553896
Apol9a	599.168	-2.34915	0.672199	-3.49472	0.000474552	0.00557214
Zcchc2	203.93	1.87907	0.537733	3.49443	0.000475069	0.0055739
D430042O09Rik	121.111	1.47018	0.42098	3.49229	0.000478899	0.00559863
Cramp1l	104.953	1.66613	0.477097	3.49222	0.000479019	0.00559863
Zfp628	161.242	1.61618	0.462726	3.49274	0.000478087	0.00559863
Gm9200	48.5083	-1.24295	0.356066	-3.49078	0.000481606	0.00562454
Gm36738	31.1075	-2.50876	0.718758	-3.49041	0.000482279	0.00562706
Cntrl	143.202	1.41085	0.40425	3.49005	0.000482937	0.00562711
Hilpda	1936.03	-1.5804	0.452945	-3.48916	0.000484543	0.00564149
Gm6166	50.7508	-1.60661	0.460576	-3.48827	0.000486165	0.00565604
Gm26510	18.7702	-2.48564	0.713114	-3.48562	0.000491	0.00570356
Lamb1	169.197	2.72141	0.781101	3.48407	0.000493858	0.005728
Igsf9b	70.1128	2.2223	0.637816	3.48423	0.000493548	0.005728
Clec4a2	130.419	-1.55216	0.445753	-3.48212	0.000497466	0.00576024
Micall1	212.321	1.52244	0.437237	3.48195	0.000497775	0.00576024
Supt5	1378.77	1.16143	0.333643	3.48105	0.000499451	0.00577523
Tepsin	283.732	1.0169	0.292392	3.47786	0.000505425	0.00583543
Tmem131l	203.428	1.64956	0.474479	3.47657	0.000507877	0.00585929
Ppfia1	817.764	1.14317	0.328952	3.47519	0.000510491	0.00588498
Lmln	50.081	1.63574	0.470756	3.47471	0.000511402	0.00589101
Gcsh	1324.86	-1.21625	0.350151	-3.47351	0.000513696	0.00590848
Pdzd8	445.036	1.32552	0.381606	3.47354	0.000513649	0.00590848
Scaf8	460.036	1.33587	0.384727	3.47225	0.000516124	0.00593191
Tcf7l2	138.365	1.66346	0.47913	3.47184	0.000516906	0.00593641
Gm14288	15.4418	-3.71402	1.06993	-3.47127	0.000518	0.00594448
Ercc2	224.712	1.29015	0.371871	3.46934	0.000521744	0.00598195
Vrk2	389.239	-1.25462	0.361648	-3.46918	0.000522052	0.00598195
Zfp637	1854.6	-1.0648	0.30696	-3.46886	0.000522664	0.00598444
Ice1	174.234	1.49629	0.431577	3.46703	0.000526244	0.00601184
Postn	762.631	1.56864	0.452508	3.46655	0.000527178	0.00601319
Lgals1	24987.7	-1.16642	0.336529	-3.46602	0.000528215	0.00601627
Pcdh12	42.8873	1.66767	0.481186	3.46576	0.000528741	0.00601774
Fads2	1305.72	1.4421	0.416235	3.46463	0.000530965	0.00603562
Tmtc3	153.239	1.62233	0.468293	3.46434	0.000531531	0.00603562
Bicd2	429.023	1.53697	0.443673	3.46419	0.000531827	0.00603562
Fzd5	43.071	2.44971	0.707161	3.46415	0.000531901	0.00603562
Shb	273.838	1.09746	0.316828	3.46389	0.000532419	0.00603699
Cd300a	184.544	-1.638	0.47302	-3.46286	0.00053447	0.00605573
Arfgef1	644.765	1.11685	0.32258	3.46224	0.000535691	0.00606504
Dlat	1783.27	1.10883	0.320379	3.46099	0.000538203	0.00606765
Btaf1	284.948	1.34067	0.387359	3.46106	0.000538062	0.00606765
Fcer1g	1423.83	-1.36352	0.393944	-3.46121	0.000537748	0.00606765
Acsf2	431.357	2.08077	0.601085	3.4617	0.000536781	0.00606765
Prkce	176.731	1.46061	0.422265	3.45898	0.000542229	0.00610443
Mfsd4a	60.8894	2.45248	0.709035	3.4589	0.000542384	0.00610443
Bid	404.742	-1.21184	0.350474	-3.45771	0.000544791	0.00612698
Usp19	1349.19	1.47211	0.426026	3.45545	0.000549365	0.00615565
Osbp	447.487	1.13124	0.327358	3.45565	0.000548976	0.00615565
Cmya5	18.5613	5.54124	1.60384	3.45499	0.000550319	0.00616179
H2-M3	132.435	-2.1464	0.62137	-3.4543	0.000551723	0.00617296
Baz1b	1217.05	1.18316	0.34268	3.45266	0.000555087	0.00620603
Klhl18	344.146	1.48824	0.431194	3.45143	0.000557624	0.00622524
Tmem42	339.881	-1.20681	0.349829	-3.44972	0.000561171	0.00626023
Slx4	123.171	1.66177	0.481747	3.44946	0.000561703	0.00626157
Zfp341	42.2166	1.53509	0.445366	3.4468	0.000567274	0.00631903
Agrn	466.836	1.64854	0.478387	3.44604	0.000568866	0.00632749
Srebf1	1009.12	1.19279	0.346257	3.44481	0.000571453	0.00634234
Rbm19	458.379	1.27966	0.371454	3.445	0.000571069	0.00634234
Tshz1	117.113	1.68113	0.488012	3.44486	0.000571351	0.00634234
Mapkbp1	70.5562	1.62717	0.47257	3.44324	0.000574782	0.00637463
Gpc4	23.0552	2.38158	0.69184	3.44239	0.000576601	0.00639013
AW112010	304.06	-1.97115	0.572876	-3.4408	0.000580001	0.00642313
Fam120a	3150.88	1.2873	0.374267	3.43951	0.000582759	0.00644898
Bcl9	66.5714	2.01285	0.585421	3.4383	0.000585375	0.0064638
Ssh1	151.682	2.20093	0.640087	3.43848	0.000584983	0.0064638
Sipa1l1	370.857	1.95906	0.569725	3.4386	0.000584733	0.0064638
Cit	99.3583	2.4422	0.710366	3.43795	0.000586131	0.00646745
Golga2	907.762	1.35322	0.393717	3.43704	0.000588102	0.00647509
Pknox1	276.913	1.18246	0.344021	3.43717	0.000587834	0.00647509
Amn1	263.103	-1.20716	0.351383	-3.43546	0.000591548	0.00650831
Btbd7	342.418	1.23899	0.36084	3.43363	0.000595558	0.00654327
Aff4	946.844	1.58914	0.462818	3.43362	0.000595586	0.00654327
Gm5182	41.1546	2.22462	0.647937	3.43339	0.000596074	0.00654389
Tmem63a	218.577	1.48087	0.431366	3.43298	0.000596995	0.00654927
Bgn	1134.25	1.6187	0.471628	3.43215	0.000598807	0.00656441
Atf3	487.235	-1.46098	0.425737	-3.43165	0.000599911	0.00657177
Clec4d	125.143	-1.42946	0.416634	-3.43097	0.00060143	0.00658141
Ppip5k2	209.463	1.46707	0.427609	3.43087	0.000601657	0.00658141
2610306M01Rik	245.526	-1.25657	0.366307	-3.43037	0.000602763	0.00658877
Rtp4	807.871	-1.67818	0.489295	-3.42979	0.000604043	0.00659801
Tmcc3	235.595	1.4565	0.424788	3.42877	0.000606324	0.00661817
Atxn1l	194.795	1.59922	0.466567	3.42764	0.000608862	0.00664109
Milr1	73.2336	-1.8176	0.530415	-3.42674	0.000610871	0.00665823
Eprs	2064.96	1.53605	0.448312	3.4263	0.000611866	0.00666429
Bcam	83.1698	1.48593	0.433843	3.42505	0.000614679	0.00668056
Ppp2r3a	129.004	1.69786	0.495664	3.42542	0.000613858	0.00668056
Zfp407	90.8539	1.50885	0.440527	3.4251	0.000614581	0.00668056
Inka1	561.103	-1.00403	0.29332	-3.42298	0.000619393	0.00672219
Rilpl2	648.731	-1.2715	0.371497	-3.42263	0.000620179	0.00672591
Mfhas1	76.2304	1.76996	0.5173	3.42153	0.000622694	0.00674837
Chd9	167.88	1.4917	0.436117	3.42042	0.000625238	0.00676629
Batf	284.607	-1.1803	0.345136	-3.41982	0.000626621	0.00677643
Anapc1	1615.9	1.46394	0.428133	3.41937	0.000627667	0.00677809
Gja1	441.146	1.04684	0.306145	3.41944	0.000627505	0.00677809
Espl1	224.801	1.33051	0.389158	3.41893	0.000628668	0.00677926
Plxnc1	997.778	-1.33315	0.389923	-3.41902	0.000628477	0.00677926
Tgfbrap1	370.974	1.28019	0.374642	3.41711	0.000632905	0.00681672
Zzz3	445.595	1.0179	0.297929	3.41659	0.000634096	0.00682327
Adcyap1r1	19.6839	2.27687	0.666886	3.41418	0.00063974	0.00687426
Shroom4	45.942	1.88424	0.55186	3.41434	0.000639376	0.00687426
Adarb1	75.1303	1.52111	0.445583	3.41376	0.000640736	0.00687524
Pard3	273.519	1.21519	0.355961	3.41384	0.000640553	0.00687524
E2f8	237.768	1.17235	0.343462	3.41334	0.000641729	0.00688103
Map3k13	37.7416	2.16737	0.63513	3.41248	0.00064374	0.00689773
Armcx4	12.5367	3.37244	0.988465	3.41179	0.000645376	0.00690851
Wdr35	359.289	1.26151	0.369854	3.41083	0.000647661	0.00692509
Sorbs3	2293.46	1.6159	0.473894	3.40983	0.000650028	0.00694198
Stk36	44.3256	2.06997	0.607068	3.40978	0.000650153	0.00694198
Tm4sf1	5416.62	-1.14227	0.335133	-3.40842	0.000653413	0.00695722
Pan3	219.909	1.44548	0.424057	3.4087	0.000652741	0.00695722
Socs7	237.966	1.45235	0.426096	3.4085	0.000653209	0.00695722
Jup	245.331	2.16188	0.634467	3.40739	0.000655863	0.00696866
Ino80	157.791	1.64558	0.482918	3.40758	0.000655429	0.00696866
Zfhx2	17.4983	3.1858	0.93495	3.40745	0.000655717	0.00696866
Serinc5	50.0282	1.69295	0.497028	3.40614	0.000658892	0.00699596
R3hdm1	675.013	1.44796	0.425763	3.40086	0.000671753	0.00711758
Prdm2	199.977	1.35808	0.399747	3.39734	0.000680437	0.00720457
Ppp6r3	1003.82	1.07288	0.315847	3.39682	0.000681735	0.00721104
Gnao1	200.187	1.98344	0.583928	3.39672	0.000681997	0.00721104
Pygm	202.214	2.16908	0.638699	3.39609	0.000683561	0.00722232
Vars2	419.121	1.30163	0.383293	3.39591	0.000684014	0.00722232
Kdm2b	186.973	1.31672	0.38794	3.39414	0.000688449	0.00725905
Smg1	274.679	1.6817	0.495667	3.39281	0.000691804	0.00728889
Tmem243	207.831	-1.29273	0.381041	-3.39263	0.000692238	0.00728889
Lrp10	1146.62	1.69342	0.499176	3.39243	0.000692762	0.00728936
Ccar1	406.413	1.21917	0.359496	3.39135	0.000695504	0.00730808
Slc29a3	117.73	2.14966	0.633851	3.39143	0.000695282	0.00730808
Cd300ld	111.815	-1.61249	0.475966	-3.38783	0.000704476	0.00738703
Khsrp	1795.88	1.67297	0.493976	3.38674	0.000707279	0.00741131
Crbn	713.145	-1.18841	0.350994	-3.38584	0.000709607	0.00741492
Fcgr3	947.997	-1.18836	0.350975	-3.38587	0.000709533	0.00741492
Gzmg	10.8236	-3.65083	1.07847	-3.38518	0.000711306	0.00742279
Usp2	152.682	1.33384	0.39407	3.38478	0.000712349	0.00742857
Capn15	211.661	1.70376	0.503417	3.38439	0.000713364	0.0074323
Tspo	4188.15	-1.33418	0.394231	-3.38427	0.000713684	0.0074323
Tyro3	256.713	1.37495	0.406423	3.38304	0.00071687	0.00745525
2021-03-06	735.318	1.0755	0.318022	3.38183	0.000720052	0.00748323
Col4a3bp	202.852	1.00986	0.298652	3.38139	0.000721188	0.0074899
Erbin	488.798	1.41121	0.417512	3.38004	0.000724749	0.00751661
Cst3	7991.4	-1.02691	0.303807	-3.38012	0.000724534	0.00751661
Kif26a	84.9259	1.89938	0.562819	3.37477	0.000738787	0.00765486
Itga4	197.681	1.23211	0.365108	3.37465	0.000739087	0.00765486
Rnf111	354.484	1.28621	0.38117	3.37436	0.000739865	0.0076577
Tns3	327.441	1.58648	0.470741	3.37018	0.000751182	0.00776426
Ms4a6b	422.498	-2.08606	0.619302	-3.3684	0.000756065	0.00780411
L3mbtl3	223.067	1.6772	0.498148	3.36687	0.000760264	0.00783681
Rnft2	53.3226	1.11705	0.331906	3.36557	0.000763844	0.00786837
Dhx33	329.793	1.09364	0.324985	3.36521	0.000764863	0.00787353
Gabpb2	356.816	1.04055	0.309327	3.36392	0.00076844	0.007905
Ms4a4c	150.373	-1.85715	0.552124	-3.36365	0.000769201	0.00790747
Nnmt	721.753	-1.27953	0.380455	-3.36315	0.000770593	0.00791642
Dhx37	480.058	1.42573	0.42408	3.36194	0.000773976	0.00793508
Clec4e	67.7416	-2.03609	0.605999	-3.35989	0.000779732	0.0079887
Dpy19l3	156.604	1.1208	0.33371	3.3586	0.000783382	0.00801529
Hcar2	52.8608	-2.11469	0.629603	-3.35877	0.00078291	0.00801529
Znfx1	450.498	1.53145	0.456056	3.35803	0.000784998	0.00802642
Thbs4	44.9819	4.95911	1.47695	3.35767	0.000786027	0.00803154
Furin	867.489	1.54555	0.460427	3.35677	0.000788577	0.00805217
Jph2	686.466	1.22019	0.363652	3.35539	0.000792545	0.00808726
Nedd4	8328	1.64771	0.491112	3.35507	0.000793457	0.00809113
Slpi	55.9114	-1.16814	0.348226	-3.35455	0.000794939	0.00809538
Myh10	11.0954	3.04802	0.909009	3.35312	0.000799048	0.00813177
Klra2	90.569	-2.26417	0.675316	-3.35275	0.000800125	0.00813728
AB124611	131.026	-1.49111	0.44481	-3.35223	0.000801624	0.00814707
Fbxo6	1003	-1.37315	0.409688	-3.3517	0.000803174	0.00815737
Rfx7	443.031	1.2257	0.365943	3.34944	0.000809757	0.0082023
Rexo1	364.66	1.5023	0.448488	3.3497	0.000808994	0.0082023
Ctdspl	253.17	1.47642	0.440852	3.34903	0.000810963	0.00820904
Abr	498.792	1.15338	0.344477	3.34821	0.000813364	0.00822786
Brd3	417.145	1.19013	0.355487	3.34788	0.000814334	0.0082322
Aldh5a1	120.226	1.2066	0.360476	3.34724	0.000816202	0.00823464
Mcc	196.318	1.36926	0.409047	3.34744	0.000815616	0.00823464
Pcdhgb2	296.428	2.06695	0.617476	3.34742	0.000815689	0.00823464
Snrnp27	2194.49	-1.17505	0.351216	-3.34565	0.000820894	0.00827648
Mmp2	145.637	1.56651	0.468275	3.34527	0.000822011	0.00828225
C3	511.315	1.92338	0.575037	3.34479	0.000823458	0.00828585
Sulf1	69.721	1.84358	0.551409	3.34341	0.000827566	0.00829194
Ica1l	54.3503	-1.39625	0.417609	-3.34343	0.000827499	0.00829194
Dnmt3b	72.8458	1.10699	0.331013	3.34423	0.000825108	0.00829194
Sec24c	1189.69	1.09744	0.328228	3.34352	0.00082724	0.00829194
Fbxl18	169.431	1.76744	0.528522	3.34413	0.000825419	0.00829194
Top1	1054.12	1.22602	0.366707	3.34333	0.000827808	0.00829194
Phlpp2	88.5196	1.40441	0.420091	3.34311	0.000828442	0.00829206
Ggcx	574.278	1.03355	0.309192	3.34276	0.000829497	0.00829715
Ubr5	479.312	1.94895	0.583472	3.34026	0.000837008	0.00836677
Ppm1l	73.6185	1.49883	0.448841	3.33934	0.00083979	0.00838906
Mef2d	1279.51	1.64456	0.492563	3.33877	0.000841496	0.00840059
Adgrg1	403.66	1.69062	0.506425	3.33834	0.000842799	0.00840806
Saysd1	446.515	-1.51547	0.454103	-3.33729	0.000845985	0.00843432
Ggct	160.227	-1.12896	0.338365	-3.33651	0.000848377	0.00845262
Cd40	108.821	-1.90454	0.570864	-3.33624	0.000849209	0.00845536
Phf11d	579.847	-2.27845	0.683001	-3.33593	0.000850134	0.00845903
Kif1c	1306.49	1.36896	0.410643	3.33369	0.000857009	0.00852185
Gripap1	309.128	1.31122	0.393509	3.33212	0.000861856	0.00855326
Aplp2	2724.2	1.30177	0.390727	3.33167	0.000863253	0.00856153
Arid3a	65.519	1.51612	0.455153	3.331	0.000865332	0.00857655
Cyb5a	4723.96	-1.21298	0.364175	-3.33077	0.000866046	0.00857803
Pole4	4240.71	-1.33942	0.402182	-3.33039	0.000867252	0.00858003
Spg20	810.089	1.50927	0.453212	3.33017	0.000867942	0.00858003
Psma5	3163.11	-1.19335	0.35834	-3.33021	0.000867813	0.00858003
Plekha7	120.948	1.20808	0.362873	3.3292	0.000870961	0.00860428
Ptk7	39.0112	1.62458	0.488415	3.32623	0.000880285	0.00868509
Stk4	1175.68	1.25456	0.377263	3.32541	0.000882891	0.00870516
Nr1d1	106.694	1.74273	0.524135	3.32496	0.000884317	0.00871357
Tet2	153.224	1.60342	0.48246	3.32343	0.000889164	0.00875564
Top2b	529.705	1.4686	0.442014	3.32252	0.000892089	0.00875769
Foxp1	474.798	1.02542	0.308631	3.32247	0.000892254	0.00875769
Sbno1	958.92	1.11993	0.33703	3.32293	0.000890772	0.00875769
Sart1	785.871	2.00165	0.602427	3.32264	0.000891696	0.00875769
Qk	1264.81	1.15388	0.347272	3.32269	0.000891539	0.00875769
Zfp326	235.092	1.0827	0.32601	3.32107	0.00089673	0.00879307
Adamts9	20.7155	2.76935	0.833895	3.32098	0.000897016	0.00879307
Myof	218.918	1.90506	0.573815	3.31999	0.000900193	0.00881285
Gm21388	9.08505	-2.91428	0.877773	-3.32008	0.00089991	0.00881285
Hcn2	163.633	2.02767	0.610831	3.31953	0.000901688	0.00882179
Sox11	716.52	1.23658	0.372718	3.31772	0.000907557	0.00886779
Ranbp10	198.259	1.16408	0.350907	3.31735	0.000908747	0.00887371
Slc41a1	262.427	1.33745	0.40353	3.31438	0.000918474	0.00895144
Ddx39	5084.95	-1.09354	0.329975	-3.31401	0.000919684	0.00895175
Iqgap3	330.186	1.58271	0.477582	3.31401	0.000919674	0.00895175
Atp1b2	35.5929	1.68321	0.508095	3.31279	0.000923716	0.00898524
Bahd1	220.467	1.53585	0.463716	3.31205	0.000926149	0.00900314
1700066B19Rik	13.0768	-2.26389	0.683701	-3.31123	0.000928869	0.00901805
mt-Nd6	4225.53	1.89268	0.571655	3.31087	0.00093007	0.00901817
Rpl3-ps2	54.092	-1.34865	0.407329	-3.31096	0.000929749	0.00901817
Ptrh1	295.397	-1.00698	0.3042	-3.31027	0.00093207	0.00902898
Gm5776	58.5637	-1.45589	0.439822	-3.31018	0.000932373	0.00902898
Zbtb42	127.944	1.45705	0.440292	3.30928	0.000935379	0.00905232
Cnnm4	232.216	1.47204	0.444855	3.30904	0.000936155	0.00905407
Wdr26	1379.09	1.37768	0.4165	3.30775	0.000940485	0.00909015
Pik3ca	411.448	1.41558	0.428013	3.30733	0.000941897	0.00909802
Hddc2	1662.04	-1.25682	0.380219	-3.30553	0.000947968	0.00914503
Bcor	431.71	1.30522	0.395027	3.30412	0.000952753	0.00917372
6720489N17Rik	68.7755	-1.42534	0.431516	-3.3031	0.00095623	0.00920137
AU040320	496.274	1.34737	0.408109	3.30149	0.000961734	0.00923678
Fam168a	409.894	1.22467	0.370936	3.30157	0.00096144	0.00923678
Serpinb6b	79.7639	-1.82616	0.55317	-3.30127	0.000962491	0.00923821
Igf2bp2	117.727	1.48358	0.449493	3.30057	0.000964884	0.00924366
Mvb12b	846.196	1.18667	0.359524	3.30067	0.000964552	0.00924366
Med1	470.523	1.03987	0.315138	3.29974	0.000967753	0.0092653
Runx1	122.461	1.38668	0.420405	3.29843	0.000972255	0.00930254
Fubp3	396.973	1.13979	0.345739	3.29666	0.00097842	0.00935564
Zfp839	85.0845	1.3622	0.413392	3.29518	0.00098358	0.00939316
Crat	360.481	1.33589	0.405461	3.29474	0.00098514	0.00940215
Usp8	613.764	1.15781	0.35151	3.29382	0.000988342	0.00942678
Taf1	448.181	1.42369	0.432388	3.29263	0.000992565	0.00946113
Cep104	343.111	1.07609	0.327039	3.2904	0.00100046	0.0095125
Zfp217	239.168	1.29213	0.392823	3.28933	0.00100425	0.00954257
Apopt1	3028.43	-1.21116	0.36839	-3.28772	0.00101002	0.00958597
Gm6055	158.444	-1.34692	0.409685	-3.2877	0.00101008	0.00958597
Lclat1	512.238	1.6763	0.509988	3.28694	0.00101281	0.00960592
Pde4d	175.471	1.2847	0.39095	3.28611	0.00101582	0.00962391
Asns	3459.14	-1.01144	0.307864	-3.28536	0.00101853	0.00963005
Kifc3	380.537	1.03134	0.313905	3.28552	0.00101794	0.00963005
Gm3716	47.9948	-1.23104	0.374689	-3.2855	0.00101802	0.00963005
Acin1	1104.07	1.03157	0.31401	3.28514	0.00101933	0.00963169
Mrpl13	6445.16	-1.23032	0.374603	-3.28433	0.00102223	0.0096531
Cyba	4085.82	-1.4731	0.448615	-3.28368	0.00102463	0.00966968
Nfatc2	966.039	1.19112	0.362874	3.28247	0.00102902	0.00970509
Trim44	663.241	1.45084	0.442139	3.2814	0.00103292	0.00973588
Cdr2l	377.954	1.43542	0.437504	3.28093	0.00103465	0.00974607
Olfm1	138.109	1.31559	0.401141	3.27963	0.00103945	0.00978527
Ubap2l	1846.24	1.37818	0.42045	3.27787	0.00104595	0.00984034
H2-Ab1	5132.24	-1.57682	0.481105	-3.2775	0.0010473	0.00984698
Rpl19-ps1	34.8728	-1.76908	0.53992	-3.27656	0.0010508	0.00987375
Rbm15b	629.309	1.13243	0.345899	3.27387	0.00106084	0.00995058
Ifi47	2555.42	-1.89142	0.577738	-3.27385	0.00106094	0.00995058
Xaf1	890.543	-1.52607	0.466457	-3.27162	0.00106935	0.0100232
Actr3b	122.445	-1.20756	0.369214	-3.27063	0.00107309	0.0100508
C920006O11Rik	28.9785	-1.75322	0.536072	-3.27049	0.00107361	0.0100508
Flii	1055.66	1.60786	0.492155	3.26699	0.00108697	0.0101633
Clec2d	433.627	-2.01142	0.615664	-3.26708	0.00108664	0.0101633
Adgrd1	45.5431	1.98616	0.608187	3.26571	0.0010919	0.0101907
Hyou1	3294.72	1.17778	0.360785	3.26449	0.00109662	0.0102284
Fam171a1	244.13	1.0192	0.312268	3.26387	0.00109903	0.0102445
Aff3	166.166	1.7311	0.530497	3.26316	0.00110178	0.0102639
Rpl17	1662.67	-4.47222	1.37076	-3.26259	0.00110401	0.0102784
Hipk2	102.287	1.73701	0.532459	3.26225	0.00110533	0.0102841
Rnf145	535.476	1.56647	0.480264	3.26169	0.00110752	0.0102921
Mark2	646.275	1.00203	0.30728	3.26095	0.00111039	0.0103125
Tsc1	301.414	1.09235	0.335051	3.26025	0.00111313	0.0103316
Pacs2	712.648	1.30247	0.399603	3.25939	0.0011165	0.0103503
Ticam1	430.272	1.05998	0.325304	3.25843	0.00112031	0.0103729
Thbs1	416.444	1.89002	0.580167	3.25771	0.00112314	0.0103928
Tyrobp	1065.97	-1.70754	0.524301	-3.2568	0.00112676	0.0104199
Lzts3	102.306	1.44275	0.443286	3.25466	0.00113526	0.0104879
Wfs1	192.906	1.88666	0.579725	3.2544	0.00113632	0.0104879
Rpl37	9735	-1.0169	0.312481	-3.25426	0.00113686	0.0104879
Actn1	669.577	1.71872	0.52818	3.25405	0.00113773	0.0104894
R3hdm2	472.518	1.81048	0.556538	3.2531	0.00114152	0.0105181
Commd7	1882.23	-1.09705	0.337259	-3.25286	0.00114251	0.0105208
Tcerg1	560.351	1.35135	0.415516	3.25223	0.00114502	0.010532
Selenon	732.64	1.05106	0.323311	3.25093	0.00115029	0.0105631
Ehd2	309.597	1.5287	0.470272	3.25068	0.00115129	0.0105633
Idnk	1165.61	-1.50305	0.462682	-3.24855	0.00115993	0.0106233
Ccdc85c	809.369	1.16175	0.35762	3.24857	0.00115987	0.0106233
Meis2	915.543	1.17333	0.361217	3.24828	0.00116105	0.0106271
2610507B11Rik	2419.88	1.34586	0.414757	3.24493	0.00117479	0.0107399
Vash1	42.0931	1.80757	0.557122	3.24449	0.00117662	0.0107437
Dpysl3	86.3473	1.82339	0.561992	3.24452	0.00117651	0.0107437
Lpxn	117.055	-1.34731	0.415339	-3.24388	0.00117914	0.0107538
Gm5822	105.3	-1.03631	0.319462	-3.24391	0.001179	0.0107538
Il17b	38.5106	-1.93767	0.597384	-3.24359	0.00118033	0.0107547
2900097C17Rik	353.258	1.50141	0.462895	3.24351	0.00118065	0.0107547
Gpt	202.99	-1.19488	0.368529	-3.24231	0.00118566	0.0107938
Mrpl17	4067.82	-1.15299	0.355707	-3.2414	0.00118942	0.0108127
Mphosph9	146.947	1.15193	0.355391	3.2413	0.00118987	0.0108127
Malsu1	1180.96	-1.26358	0.390073	-3.23935	0.00119804	0.0108739
Med13	353.378	1.39976	0.432233	3.23844	0.00120183	0.0109019
Cdk13	313.113	1.3911	0.429653	3.23773	0.00120484	0.0109096
Dab2ip	401.163	1.87029	0.577983	3.23589	0.00121266	0.0109674
Gm6274	294.647	-1.00762	0.311465	-3.23509	0.00121606	0.010985
Urb1	125.018	1.91783	0.593088	3.23364	0.00122225	0.0110344
P2ry10	48.4853	-2.44418	0.756003	-3.23303	0.00122484	0.0110512
Snx30	207.129	1.48972	0.460819	3.23278	0.00122593	0.0110544
Sec63	1174.31	1.05879	0.327671	3.23125	0.00123249	0.0110939
Ccl9	1600.88	-1.27533	0.394735	-3.23085	0.00123423	0.011103
Pacs1	406.106	1.72676	0.534668	3.2296	0.00123963	0.0111317
Efnb1	62.6654	1.51771	0.469909	3.2298	0.00123875	0.0111317
Irak2	738.618	-1.14017	0.353029	-3.22968	0.0012393	0.0111317
Spata13	65.1201	1.44948	0.448874	3.22915	0.00124159	0.0111428
Dhcr24	1647.82	1.33841	0.41452	3.22883	0.00124298	0.0111487
Mrap	285.372	1.28294	0.397375	3.22853	0.00124427	0.0111506
Mthfs	18.9577	-2.02986	0.628821	-3.22804	0.00124643	0.0111506
AI606181	43.3189	2.47451	0.76663	3.22777	0.00124759	0.0111506
Gm21399	1578.86	-1.03069	0.319306	-3.22792	0.00124694	0.0111506
Lrrc32	73.8091	2.17133	0.672854	3.22704	0.00125079	0.0111725
Ganab	1679.9	1.09964	0.340809	3.22657	0.00125282	0.0111841
Rubcn	345.839	1.37665	0.426882	3.2249	0.00126018	0.0112408
Gm12250	1194.93	-2.20949	0.685159	-3.22479	0.00126065	0.0112408
Brk1	6210.58	-1.24064	0.384821	-3.22395	0.00126438	0.0112674
Tph2	502.882	-1.3737	0.426121	-3.22372	0.00126536	0.0112695
Adcy6	154.897	1.338	0.415127	3.2231	0.00126811	0.0112874
Apaf1	438.013	1.0864	0.33723	3.22155	0.00127497	0.011322
Upf1	1031.92	1.51345	0.469769	3.2217	0.00127434	0.011322
Synj2	151.941	1.28725	0.399633	3.22107	0.00127712	0.0113345
Pde10a	332.292	1.08865	0.337998	3.22089	0.00127792	0.0113349
Emilin1	872.273	1.52242	0.472785	3.2201	0.00128145	0.0113596
Calhm5	181.979	-1.0087	0.313611	-3.21639	0.00129815	0.0114875
Fbxo10	367.762	1.26518	0.393455	3.21556	0.00130191	0.0115141
Aprt	4004.03	-1.14652	0.356623	-3.21493	0.00130476	0.0115248
Sacs	51.1416	1.89599	0.589771	3.21479	0.0013054	0.0115248
Clec12a	273.721	-1.59376	0.495954	-3.21353	0.00131116	0.0115648
2010320M18Rik	217.087	-1.20238	0.374169	-3.21346	0.00131145	0.0115648
Dusp18	346.975	1.35319	0.421426	3.21097	0.00132288	0.0116521
Gm6030	16.3499	-2.26242	0.70498	-3.20919	0.00133109	0.0117176
Rps19-ps6	70.4138	-1.59905	0.498365	-3.20859	0.00133387	0.0117285
Tom1l2	2076.59	1.11676	0.348228	3.20698	0.00134137	0.0117808
Ndrg2	387.78	1.22704	0.382639	3.20677	0.00134236	0.0117827
Abcf1	2090.26	1.19576	0.372912	3.20655	0.00134336	0.0117846
Hdac11	460.123	-1.04666	0.32651	-3.20559	0.00134786	0.0118173
Emsy	465.028	1.23805	0.386261	3.2052	0.00134968	0.0118265
Unc5b	72.9227	1.9527	0.609411	3.20424	0.0013542	0.0118592
Ddr1	1225.72	1.5166	0.473376	3.2038	0.00135625	0.0118635
Gm6451	38.5641	-1.79804	0.561215	-3.20384	0.00135608	0.0118635
Src	903.261	1.54501	0.482301	3.20342	0.00135808	0.0118726
Slc7a6os	887.903	-1.07293	0.334952	-3.20323	0.00135898	0.0118737
Cpsf1	715.654	1.14993	0.359101	3.20224	0.00136365	0.0119076
Pds5a	760.551	1.17528	0.367051	3.20194	0.00136506	0.0119131
Eif5b	1272.66	1.64908	0.515066	3.20169	0.00136623	0.0119165
Dennd3	50.6704	1.78952	0.558966	3.20149	0.00136721	0.0119182
Tgfbr2	507.394	1.18042	0.368778	3.2009	0.00136997	0.0119354
Fam120c	39.7507	2.22049	0.693768	3.20062	0.00137131	0.0119379
Capn2	1137.2	1.29735	0.405358	3.20051	0.00137183	0.0119379
Sirpb1a	56.7956	-2.50379	0.782497	-3.19975	0.00137547	0.0119627
Filip1	95.317	1.46992	0.459452	3.19928	0.00137771	0.0119754
Zbtb10	69.7369	1.54792	0.483922	3.19869	0.00138053	0.011993
Gsdmd	283.792	-1.57877	0.49361	-3.19842	0.00138184	0.0119975
Mgarp	993.147	-1.06792	0.334283	-3.19465	0.00139999	0.0121343
Gins2	906.981	-1.38882	0.434925	-3.19324	0.00140685	0.0121799
Cxcl10	1594.91	-1.60569	0.502837	-3.19326	0.00140675	0.0121799
Cgnl1	18.2529	2.80979	0.879977	3.19303	0.0014079	0.012182
Gm15427	781.913	-1.09513	0.343017	-3.19265	0.00140976	0.0121912
Nrd1	1581.61	1.12206	0.351606	3.19126	0.00141655	0.0122429
Dyrk1a	679.118	1.00414	0.314717	3.1906	0.00141978	0.0122569
Nbea	151.779	1.64114	0.514365	3.19061	0.00141971	0.0122569
Sfswap	491.404	1.0856	0.340343	3.18973	0.00142408	0.012287
Gga3	227.528	1.24718	0.391102	3.18889	0.00142821	0.0123157
Ptpn3	115.753	1.09937	0.344777	3.18862	0.00142952	0.01232
H2-Aa	5011.06	-1.73147	0.543046	-3.18843	0.00143047	0.0123212
Hdac6	226.736	1.28316	0.402528	3.18776	0.00143378	0.0123368
Rab11fip3	190.627	1.55412	0.48753	3.18774	0.0014339	0.0123368
Kmt2c	110.892	2.14597	0.673322	3.18714	0.00143688	0.0123484
Sik3	801.216	1.23176	0.386606	3.18609	0.00144212	0.0123864
P3h2	90.5622	1.78448	0.56024	3.18521	0.00144651	0.0124171
Rps3a2	1072.63	-1.13754	0.357169	-3.18487	0.00144819	0.0124245
Sp3os	126.636	-1.37038	0.430395	-3.184	0.00145255	0.0124549
Pls3	317.012	1.45977	0.458509	3.18373	0.0014539	0.0124595
BC024978	104.827	1.23022	0.386492	3.18304	0.00145737	0.0124751
Ddi2	351.747	1.20714	0.379348	3.18215	0.00146184	0.0125063
Smarcc1	1637.35	1.36256	0.428255	3.18166	0.00146436	0.0125208
Usp4	1382.59	1.20746	0.379661	3.18037	0.00147086	0.0125623
Slit2	68.5316	1.56872	0.493663	3.17772	0.00148437	0.0126705
Klf6	1735.08	-1.09432	0.344407	-3.1774	0.00148604	0.0126776
Gm14167	19.0816	-3.04081	0.957317	-3.17639	0.00149119	0.0127144
Stab1	181.443	1.65008	0.519538	3.17605	0.00149296	0.0127224
Eng	2771.09	1.33333	0.419915	3.17523	0.00149716	0.0127511
Abl1	876.365	1.50938	0.475409	3.17491	0.00149883	0.0127581
Lgi4	26.3472	-1.52302	0.479825	-3.17411	0.00150296	0.0127818
Slc4a8	584.018	1.16631	0.367563	3.1731	0.00150823	0.0128094
A330009N23Rik	35.3007	-1.57258	0.495585	-3.17318	0.00150777	0.0128094
Cdh13	76.0183	1.72464	0.543631	3.17244	0.00151164	0.012824
Ccl12	140.686	-1.60724	0.507124	-3.16933	0.00152793	0.012955
Hprt	5401.72	-1.06171	0.335078	-3.16854	0.00153208	0.012983
Rpl5	21357.9	-1.34671	0.425071	-3.1682	0.00153384	0.0129833
Ccdc47	1341.97	1.00071	0.315848	3.16833	0.00153317	0.0129833
Trappc2l	1654.46	-1.33223	0.420741	-3.16639	0.00154344	0.0130356
Abcc2	13.8369	3.40801	1.07627	3.1665	0.00154288	0.0130356
Gm44386	175.694	-1.33072	0.420408	-3.16531	0.00154919	0.0130769
Pelp1	595.735	1.3047	0.412333	3.16418	0.00155519	0.0131202
Elovl6	638.825	1.01942	0.322195	3.164	0.00155618	0.0131213
Tnxb	42.6813	2.51483	0.795653	3.16071	0.00157383	0.0132627
Cnbp	15879.7	-1.22703	0.388257	-3.16035	0.00157582	0.0132722
Map7d1	1507.92	1.2524	0.39634	3.1599	0.00157821	0.013285
Otud7b	291.546	1.42763	0.451824	3.15971	0.00157928	0.0132866
Fbxl19	884.013	1.00258	0.317336	3.15938	0.00158108	0.0132943
Hspb8	428.89	1.30588	0.413605	3.15732	0.00159229	0.0133664
Obsl1	485.469	1.54097	0.488441	3.15487	0.0016057	0.0134406
Vhl	2752.59	-1.18567	0.375794	-3.15512	0.00160432	0.0134406
Slc45a4	286.681	1.09123	0.345911	3.15465	0.00160692	0.0134406
1600014C23Rik	94.7779	-1.3463	0.426811	-3.15432	0.00160873	0.0134406
AC123956.1	33.7351	-1.7112	0.542505	-3.15425	0.00160909	0.0134406
Ptprb	53.778	1.62919	0.516636	3.15346	0.0016135	0.01347
Vcp	2276.29	1.30241	0.413063	3.15306	0.00161568	0.0134735
2900026A02Rik	23.2468	2.56874	0.814679	3.15307	0.00161564	0.0134735
Rock2	848.899	1.4416	0.457319	3.15228	0.00162002	0.0135023
Phf12	376.929	1.46729	0.465534	3.15185	0.0016224	0.0135146
Klhl42	426.959	1.09057	0.346098	3.15104	0.0016269	0.0135447
Zfp687	361.468	1.3839	0.439515	3.1487	0.00163997	0.0136311
Slc41a2	66.7108	1.654	0.525523	3.14734	0.00164765	0.01368
Prg4	12.8926	3.24907	1.03239	3.14714	0.00164876	0.0136817
Slmap	471.683	1.25584	0.399294	3.14514	0.00166005	0.0137679
Ccl4	102.904	-1.72033	0.54705	-3.14474	0.00166232	0.0137792
Rps19bp1	1499.99	-1.02336	0.32548	-3.14415	0.00166571	0.0137998
Nploc4	1689.35	1.0455	0.332556	3.14382	0.00166759	0.0138078
Zswim7	519.097	-1.26737	0.403302	-3.1425	0.00167512	0.0138551
Farp2	87.4775	1.17053	0.37248	3.14253	0.00167494	0.0138551
Sparcl1	2956.76	1.68819	0.537641	3.13999	0.00168954	0.0139515
Nrp1	149.709	1.23674	0.393964	3.13921	0.00169402	0.0139807
Isg20	346.642	-1.15517	0.368046	-3.13864	0.00169732	0.0139854
Ncoa3	173.698	1.57711	0.502613	3.13782	0.00170207	0.0140169
Taf4	143.383	1.44028	0.45908	3.13733	0.00170496	0.0140332
Fnbp1	359.951	1.25956	0.401607	3.13631	0.00171091	0.0140669
Ap2a2	1067.59	1.20276	0.383587	3.13556	0.00171527	0.0140874
Gm8730	421.477	-1.32896	0.423856	-3.13539	0.00171625	0.0140879
Rpl26	18530.3	-1.07601	0.343424	-3.13319	0.00172918	0.0141787
Rpsa	49331.9	-1.05565	0.336999	-3.13252	0.00173314	0.0141948
Zfp574	240.743	1.46221	0.466758	3.13269	0.00173214	0.0141948
Zfp930	316.074	-1.16061	0.37052	-3.13238	0.00173394	0.0141948
Vwf	250.323	1.50353	0.480187	3.13114	0.00174128	0.0142472
Abhd2	492.782	1.4945	0.477432	3.13029	0.00174632	0.014273
Serpinb9	357.77	-1.79568	0.573688	-3.13005	0.00174774	0.014277
Ctdp1	236.227	1.14137	0.364771	3.12901	0.00175395	0.0143123
Mark4	471.423	1.56479	0.500154	3.12861	0.00175637	0.0143126
Nip7	2929.97	-1.47586	0.471743	-3.12853	0.00175681	0.0143126
Rplp0	101197	-1.25432	0.400917	-3.12862	0.00175627	0.0143126
Abca12	126.164	1.11169	0.355404	3.12797	0.00176018	0.0143323
Ppp2r5d	1510.51	1.01929	0.325893	3.12768	0.00176191	0.0143388
Ptpn4	211.342	1.34936	0.431536	3.12687	0.00176676	0.0143706
Tbc1d2b	304.466	1.10145	0.352297	3.12649	0.00176906	0.0143816
Arf5	6595.95	-1.13252	0.362303	-3.1259	0.00177262	0.0144028
Bbs1	64.0037	1.40011	0.448287	3.12324	0.00178872	0.014518
Flt4	115.396	1.01207	0.324182	3.12192	0.00179678	0.0145663
Med15	563.007	1.18257	0.378891	3.12114	0.00180152	0.0145908
AC154683.1	14.3468	-1.79131	0.574051	-3.12047	0.00180565	0.0146165
B4galt6	234.526	1.00022	0.320589	3.11994	0.0018089	0.014635
Lnx2	193.398	1.47429	0.472697	3.1189	0.00181528	0.0146541
Cry2	64.7988	1.36762	0.438439	3.1193	0.00181281	0.0146541
Tmem170b	130.598	1.3694	0.439074	3.11883	0.00181572	0.0146541
Spryd7	678.698	-1.20195	0.385436	-3.11842	0.00181823	0.0146558
Mia3	678.658	1.09024	0.349613	3.11842	0.00181822	0.0146558
Xylt2	418.7	1.13774	0.364866	3.11823	0.00181939	0.0146574
Arid4a	155.085	1.61756	0.518854	3.11756	0.00182353	0.014683
Adam19	61.7548	1.91051	0.61291	3.11711	0.00182636	0.0146902
2610035D17Rik	151.322	-1.22269	0.392491	-3.1152	0.0018382	0.0147698
Commd6	655.199	-1.44426	0.463902	-3.11328	0.00185021	0.0148584
Sbk1	233.647	1.34577	0.432488	3.1117	0.00186013	0.0149223
Map3k1	226.222	1.51209	0.486014	3.1112	0.00186327	0.0149396
Osbpl11	199.313	1.32202	0.42498	3.11079	0.0018659	0.0149528
Rpl9	26026.9	-1.58536	0.50976	-3.11001	0.0018708	0.0149841
Nectin1	18.8286	2.97392	0.956554	3.10899	0.00187727	0.0150201
Tent4a	226.068	1.11423	0.358386	3.10902	0.00187711	0.0150201
Zzef1	369.091	1.1225	0.361188	3.10781	0.00188479	0.0150724
Hapln1	189.503	-2.08029	0.669417	-3.10761	0.00188608	0.0150747
Isoc2b	539.635	-1.22843	0.395584	-3.10537	0.0019004	0.0151732
Pdlim2	470.075	-1.22805	0.395489	-3.10514	0.00190191	0.0151773
Neb	14.4308	3.97784	1.28122	3.10473	0.00190454	0.0151824
Fam222a	24.473	2.0357	0.655673	3.10474	0.00190446	0.0151824
Ppp2r5e	648.757	1.04652	0.337094	3.10454	0.00190575	0.015184
Zfp445	289.788	1.22411	0.394345	3.10416	0.00190821	0.0151957
Upf2	182.62	1.96836	0.63429	3.10324	0.00191413	0.0152311
Atp6v1f	8744.09	-1.32903	0.428441	-3.10202	0.00192205	0.0152819
Arpc4	9914.39	-1.13286	0.365384	-3.10046	0.00193219	0.0153392
Gm7733	82.0123	-1.17757	0.379805	-3.10045	0.00193229	0.0153392
Fkbp15	419.742	1.14144	0.36818	3.10023	0.00193371	0.0153424
Slfn4	16.496	-2.68722	0.866966	-3.09956	0.00193806	0.0153575
Lst1	154.481	-1.34165	0.432865	-3.09947	0.00193864	0.0153575
Pdgfra	49.8273	2.07577	0.669776	3.0992	0.00194046	0.0153639
Gm12115	140.716	-1.44377	0.465931	-3.09868	0.00194384	0.0153826
Pear1	249.759	1.64493	0.530928	3.09821	0.00194693	0.0153866
Arhgap15	39.1385	-1.69511	0.547111	-3.09829	0.00194642	0.0153866
Bcl2a1d	48.53	-1.87202	0.604294	-3.09786	0.00194921	0.0153866
Vcp-rs	694.281	1.15468	0.372775	3.09753	0.00195143	0.0153946
Cep192	159.173	1.50508	0.48612	3.0961	0.00196082	0.0154607
Fam117b	336.469	1.1997	0.387678	3.09458	0.00197095	0.0155244
Kif7	113.508	1.22617	0.396295	3.09408	0.00197423	0.0155422
Nbr1	904.932	1.37935	0.446159	3.09162	0.00199066	0.0156634
Jag1	107.265	1.54391	0.499447	3.09124	0.00199321	0.0156742
Txk	10.5346	-2.71655	0.878827	-3.09111	0.00199409	0.0156742
Irs1	24.0404	2.51059	0.812318	3.09065	0.00199717	0.0156903
Saa3	826.209	-1.35395	0.438418	-3.08827	0.00201328	0.0157842
Fosl2	606.06	1.22259	0.395914	3.08802	0.00201496	0.0157892
2021-09-01	94.583	-1.10871	0.359069	-3.08774	0.00201687	0.015796
Gm17435	31.6554	-1.62302	0.525674	-3.08751	0.00201843	0.0158001
Phf20	204.358	1.04262	0.337746	3.08701	0.00202183	0.0158104
Cav2	1253.95	-1.4023	0.454308	-3.08668	0.00202406	0.0158198
Nom1	428.516	1.02321	0.331637	3.08535	0.00203316	0.0158664
Lpar5	127.33	1.1756	0.381124	3.08455	0.00203858	0.0159005
Tmem192	2377.19	-1.06214	0.344519	-3.08296	0.00204956	0.0159697
Hdlbp	5512.74	1.21533	0.394245	3.08267	0.00205154	0.015977
Deptor	326.476	1.54672	0.501882	3.08185	0.00205722	0.016013
Tmem141	411.45	-1.31301	0.426128	-3.08125	0.00206132	0.0160203
Snu13	3337.47	-1.04679	0.339724	-3.0813	0.00206097	0.0160203
Nudt7	319.157	-1.28168	0.41614	-3.07991	0.00207062	0.0160777
Rpl18a	22265.6	-1.01717	0.330262	-3.07988	0.00207082	0.0160777
Chpf2	196.078	1.2372	0.401733	3.07966	0.00207237	0.0160812
Zfand4	98.2782	-1.57852	0.512589	-3.07951	0.00207338	0.0160812
Mrps33	904.396	-1.41453	0.459408	-3.07903	0.00207673	0.0160989
Siglec1	71.7144	2.08075	0.675973	3.07815	0.00208287	0.0161383
Gas2l3	636.604	1.24045	0.403005	3.078	0.00208393	0.0161383
H2-T23	1914.29	-1.76737	0.574422	-3.07679	0.00209245	0.016196
Fgd6	97.8768	1.64332	0.53418	3.07634	0.00209558	0.0162056
Bcl2	356.648	1.10687	0.359804	3.07631	0.00209583	0.0162056
Mfn1	687.088	1.14837	0.373333	3.07598	0.00209809	0.0162118
1110046J04Rik	24.8121	-1.94584	0.632844	-3.07475	0.00210676	0.0162571
Kif18b	344.766	1.30902	0.425798	3.07427	0.00211021	0.0162754
Raet1e	20.8843	-1.86734	0.607489	-3.07387	0.002113	0.0162886
Unk	290.592	1.12112	0.364744	3.0737	0.00211419	0.0162896
Rps6ka2	203.096	1.34767	0.438494	3.07341	0.00211629	0.0162975
Tmem202	36.3312	-1.89183	0.615675	-3.07278	0.00212074	0.0163235
Specc1l	579.509	1.20182	0.391213	3.07204	0.00212598	0.016339
Prkrip1	1273.25	-1.05375	0.343002	-3.07214	0.0021253	0.016339
Ankfn1	306.207	1.95983	0.638025	3.07171	0.00212839	0.0163409
E2f7	71.1174	1.96044	0.638324	3.07123	0.00213178	0.0163504
Vcl	334.382	2.12301	0.691224	3.07137	0.00213077	0.0163504
Usp37	320.22	1.01719	0.331216	3.07107	0.00213293	0.016351
Rarres2	499.619	-1.07435	0.349867	-3.07073	0.00213535	0.0163613
Rap1b	6255.11	-1.25413	0.408554	-3.06967	0.00214298	0.0164115
Itga7	57.2102	1.7911	0.583738	3.06832	0.00215263	0.0164771
Cdk6	180.188	1.25824	0.410463	3.06543	0.00217357	0.0166207
Dock10	136.485	1.04285	0.340528	3.06245	0.00219536	0.0167788
Nkg7	103.993	-1.89747	0.619754	-3.06165	0.00220119	0.0168149
Dock9	57.7931	1.87853	0.613666	3.06116	0.00220481	0.0168256
Faah	112.92	1.01714	0.332271	3.06119	0.0022046	0.0168256
Tie1	148.457	1.55217	0.507103	3.06086	0.00220702	0.0168341
Arrb1	113.23	1.34293	0.438876	3.05993	0.00221385	0.0168693
Lsm5	1015.86	-1.41647	0.462961	-3.05959	0.00221642	0.0168719
Mrpl32	1520.14	-1.15886	0.378835	-3.059	0.00222076	0.0168964
Fbxo4	299.073	-1.04305	0.341062	-3.05824	0.00222638	0.0169222
Cog7	324.215	1.34332	0.439245	3.05825	0.00222637	0.0169222
Sorbs1	920.353	1.52534	0.498871	3.05758	0.00223134	0.0169431
Nlgn2	58.4543	2.61113	0.854159	3.05696	0.00223598	0.0169697
Palb2	97.3453	1.01234	0.33124	3.0562	0.0022416	0.0169955
Plxna2	24.5226	2.20781	0.722621	3.05528	0.00224847	0.017039
Ppard	714.377	1.5274	0.500036	3.05458	0.00225374	0.0170619
Tfb1m	569.496	-1.18027	0.386685	-3.05227	0.00227121	0.0171771
Irs2	72.7948	1.9044	0.624061	3.05163	0.002276	0.0172047
Chrnb2	47.7642	1.61809	0.530347	3.05101	0.00228073	0.017232
Gm8394	197.282	-1.29297	0.423907	-3.05014	0.00228735	0.0172647
Wscd1	8.84759	2.88392	0.945879	3.04893	0.00229658	0.0173175
Tnfaip8l2	105.561	-1.35657	0.444983	-3.04858	0.00229923	0.01732
Casp1	134.284	-1.72398	0.565492	-3.04863	0.00229886	0.01732
Bdp1	144.015	1.75386	0.575373	3.04822	0.00230204	0.0173326
Chsy3	1507.69	1.16493	0.382209	3.04789	0.00230451	0.0173426
Sf3b2	2938.53	1.07511	0.352915	3.04637	0.0023162	0.0174219
Zfp236	119.466	1.24235	0.408098	3.04423	0.00233276	0.0175378
Cc2d1a	379.003	1.02808	0.33775	3.0439	0.00233534	0.0175486
Tnfrsf18	53.0925	-1.54446	0.50743	-3.04369	0.00233693	0.0175518
Pkp4	665.344	1.15439	0.379362	3.04298	0.00234247	0.0175847
Cd302	834.516	-1.31733	0.432932	-3.0428	0.00234387	0.0175865
Gm12216	32.5399	-2.09769	0.689554	-3.0421	0.00234938	0.0176105
Phldb2	136.399	1.55339	0.510694	3.04172	0.0023523	0.0176237
Adam9	1738.57	1.00676	0.331175	3.03997	0.00236601	0.0177024
Ccnjl	64.7413	1.56818	0.515861	3.03993	0.00236631	0.0177024
Trp53bp2	235.8	1.45327	0.478091	3.03973	0.00236788	0.0177055
Gm10275	1198.28	-1.40901	0.46363	-3.03908	0.00237303	0.0177266
Ctsh	1527.54	-1.08248	0.356301	-3.0381	0.00238074	0.017758
Ppp1r3e	49.838	1.47468	0.485385	3.03816	0.00238025	0.017758
Hspb11	139.507	-1.16912	0.384882	-3.03761	0.00238459	0.017778
Cep162	104.133	1.69498	0.558277	3.0361	0.00239663	0.0178545
Zmynd12	25.7967	-1.94607	0.640993	-3.03602	0.00239721	0.0178545
Smcr8	456.756	1.07167	0.353059	3.03537	0.00240237	0.0178842
Myadm	2803.67	1.58625	0.52268	3.03484	0.00240662	0.0179071
Mdga1	20.1108	1.9774	0.651821	3.03366	0.00241606	0.0179685
Gm6520	31.7879	-1.54839	0.51051	-3.03303	0.00242113	0.0179904
Gab1	95.7961	1.2791	0.421832	3.03225	0.00242735	0.018026
Rpl12	30997.9	-1.46626	0.483666	-3.03156	0.00243295	0.0180423
Nrip1	64.2981	1.48576	0.490101	3.03154	0.00243311	0.0180423
Sirpb1c	30.6851	-2.22597	0.734264	-3.03157	0.00243285	0.0180423
Peg13	193.038	1.23403	0.407179	3.03069	0.00243996	0.0180843
Ltbp2	47.1687	2.53885	0.837776	3.03046	0.00244182	0.0180892
Ano6	392.543	1.46029	0.482001	3.02964	0.00244844	0.0181294
Opa1	964.633	1.04478	0.344895	3.02929	0.00245133	0.018142
Smg6	224.843	1.65507	0.546478	3.0286	0.00245686	0.0181652
Coro7	483.337	1.46944	0.485279	3.02803	0.00246153	0.0181832
Erich1	298.511	-1.19063	0.393204	-3.02801	0.00246169	0.0181832
Mboat7	360.902	1.17702	0.388818	3.02717	0.00246855	0.0182162
Npnt	63.1954	1.32241	0.436922	3.02665	0.00247277	0.018235
Gm12912	34.7812	-1.21047	0.400106	-3.02536	0.00248333	0.0182809
Ncor1	1220.48	1.10019	0.363748	3.0246	0.00248958	0.018318
Rwdd2a	74.2658	-1.25579	0.415314	-3.02371	0.00249695	0.0183634
Gm15772	416.299	-1.15629	0.382448	-3.02338	0.00249967	0.0183744
Fhod1	115.688	1.44426	0.477768	3.02292	0.00250347	0.0183934
Lama4	773.124	1.04876	0.346985	3.02248	0.0025071	0.0184112
Cdk5r2	18.1272	2.02316	0.669546	3.02169	0.00251366	0.0184416
Rnf157	384.635	1.17928	0.39033	3.02124	0.00251746	0.0184605
Ehmt1	545.129	1.06221	0.351709	3.02014	0.0025266	0.0185187
Gfpt2	85.4878	1.8603	0.616021	3.01987	0.00252884	0.0185261
Cnnm2	146.932	1.19673	0.396381	3.01914	0.0025349	0.0185616
Itga5	746.182	1.64811	0.545918	3.01898	0.00253629	0.0185628
H2-DMa	1007.35	-1.66353	0.55116	-3.01823	0.00254259	0.0185999
Fgfr1	107.843	1.84557	0.611599	3.01761	0.00254778	0.0186171
Phf3	600.625	1.24246	0.411749	3.01751	0.00254861	0.0186171
Akap11	298.079	1.21969	0.404246	3.0172	0.00255119	0.01862
Robo1	89.1081	2.28284	0.756717	3.01677	0.0025548	0.0186354
Map3k6	127.474	1.02595	0.340184	3.01588	0.00256238	0.0186818
Zfp938	252.108	-1.07284	0.356038	-3.01328	0.00258437	0.018824
Ints9	302.837	1.35309	0.449069	3.01309	0.002586	0.0188269
Eln	140.544	1.57239	0.52201	3.01219	0.00259367	0.0188736
Cabcoco1	9.23085	2.54507	0.845029	3.01181	0.00259693	0.0188772
Gm10136	53.5051	-1.37906	0.457901	-3.0117	0.00259789	0.0188772
Selenop	5148.54	-1.26793	0.42097	-3.01192	0.00259605	0.0188772
Lpin3	51.4828	1.50341	0.499487	3.00991	0.00261324	0.0189435
Klhdc1	71.3057	-1.71927	0.57119	-3.00998	0.00261269	0.0189435
Mib1	400.287	1.31051	0.435587	3.0086	0.00262453	0.0190162
Srp54b	23.516	-3.43033	1.14074	-3.00712	0.00263736	0.0191001
Togaram1	197.412	1.29299	0.43008	3.00639	0.00264367	0.0191367
Gm47063	1063.35	-1.82789	0.608183	-3.0055	0.00265143	0.0191746
Ada	275.498	-1.15765	0.385237	-3.00504	0.00265544	0.0191854
Pcmtd1	146.648	1.24603	0.414698	3.00467	0.00265873	0.0192
Fbxl7	92.4361	1.84286	0.613372	3.00447	0.00266047	0.0192034
Rasip1	58.8898	1.81248	0.603354	3.004	0.00266452	0.0192235
Gzmb	304.013	-2.98211	0.99325	-3.00237	0.00267883	0.019281
Hist1h2bb	17.959	-2.43528	0.811052	-3.00262	0.00267667	0.019281
Rpl39	5154.86	-1.22975	0.409708	-3.00152	0.00268633	0.0193166
Sema4b	399.217	1.37299	0.457489	3.00114	0.00268973	0.019332
9330175E14Rik	130.836	-2.14218	0.713913	-3.00062	0.00269433	0.0193548
Loxl1	294.935	1.73026	0.576718	3.00019	0.00269812	0.0193625
Casp12	137.989	-1.79704	0.599072	-2.99971	0.00270241	0.0193772
Dab2	304.424	1.58273	0.527894	2.9982	0.00271579	0.0194182
Sat1	1526.99	-1.43001	0.476914	-2.99846	0.00271345	0.0194182
Zdhhc9	283.157	1.26653	0.42233	2.99891	0.00270951	0.0194182
Cnst	222.478	1.12709	0.375856	2.99873	0.00271107	0.0194182
Gaa	2813.05	1.6242	0.541807	2.99775	0.00271983	0.0194379
Ebf1	32.6249	1.65935	0.553589	2.99745	0.00272251	0.0194479
Pgm2l1	26.0813	1.87371	0.625372	2.99615	0.00273413	0.0195035
Flywch1	346.619	1.62162	0.54121	2.99628	0.00273298	0.0195035
Ccdc61	178.991	1.17236	0.391275	2.99625	0.00273326	0.0195035
Selenow	8389.18	-1.21343	0.405041	-2.99583	0.00273694	0.0195144
Slain1	77.29	1.31978	0.440801	2.99404	0.00275312	0.0196205
Gm4876	105.289	-1.36044	0.454458	-2.99355	0.00275749	0.0196424
Dstyk	783.142	1.11163	0.371421	2.99292	0.00276324	0.0196741
Dbn1	721.082	1.09485	0.365902	2.9922	0.00276972	0.0197111
Diaph1	424.783	1.50951	0.50478	2.99043	0.00278585	0.0198165
Pdcd1	115.366	-2.10313	0.703629	-2.98898	0.00279911	0.0198923
Fnbp1l	219.679	1.10851	0.370901	2.98869	0.0028018	0.0198928
Gprasp1	45.706	1.48164	0.495741	2.98873	0.00280136	0.0198928
Cnnm1	91.9186	1.3095	0.438352	2.98732	0.00281438	0.0199593
Atp11c	139.957	1.43555	0.480562	2.98724	0.00281511	0.0199593
Rpl7-ps7	43.377	-1.28929	0.431642	-2.98694	0.00281786	0.0199695
Hnrnpd	1309.31	1.49902	0.502091	2.98556	0.00283056	0.0200501
Dlx6	31.9122	-1.4006	0.469222	-2.98494	0.00283632	0.0200816
Pou6f1	171.566	1.11787	0.374588	2.98426	0.00284266	0.0201171
1700042O10Rik	15.4281	-2.48587	0.833104	-2.98386	0.00284638	0.020134
Ocrl	405.295	1.26049	0.422514	2.98331	0.00285147	0.0201606
H2-Q7	313.354	-1.4297	0.479305	-2.98285	0.00285576	0.0201816
Rbm27	237.426	1.10481	0.370701	2.98032	0.00287952	0.0203306
Cd84	171.565	-1.29378	0.434219	-2.97955	0.00288677	0.0203534
Exoc6b	259.33	1.13685	0.381635	2.97888	0.00289302	0.020388
Scrib	928.432	1.25264	0.420699	2.97751	0.00290597	0.0204698
Gm14964	24.8287	-2.00601	0.67399	-2.97633	0.00291725	0.0205302
Foxred2	134.227	1.14181	0.383826	2.97481	0.00293173	0.0206148
Wdr6	1372.02	1.10321	0.370855	2.97478	0.00293198	0.0206148
Gm9645	20.0843	-1.66655	0.560313	-2.97431	0.00293646	0.0206367
Zeb2	460.52	1.53058	0.514819	2.97304	0.00294865	0.0206937
Pigo	180.564	1.17559	0.395456	2.97275	0.00295146	0.0207038
Hdac7	177.689	1.22336	0.411728	2.97127	0.0029657	0.0207845
Sp140	95.3474	-2.19535	0.738922	-2.97102	0.00296814	0.020792
Nr4a3	833.37	1.26101	0.424533	2.97034	0.00297473	0.0207998
Plac8	559.563	-1.46769	0.494104	-2.97041	0.00297399	0.0207998
Cpz	23.2326	1.68762	0.568082	2.97073	0.00297093	0.0207998
Parp12	2209.19	-1.43822	0.484166	-2.9705	0.00297312	0.0207998
Gm7204	192.07	-1.03066	0.347097	-2.96937	0.0029841	0.0208558
Fam96b	2613.19	-1.11646	0.376189	-2.96782	0.00299918	0.0208939
Gadd45b	168.719	-1.1112	0.374683	-2.9657	0.00301999	0.0209274
1810032O08Rik	680.327	-1.87798	0.633176	-2.96596	0.00301737	0.0209274
Rbx1	4393.55	-1.12691	0.37996	-2.96587	0.00301825	0.0209274
Pafah2	230.092	1.0095	0.340308	2.96644	0.00301265	0.0209274
Med30	1224.36	-1.09298	0.368557	-2.96556	0.00302129	0.0209274
Scube3	12.9704	3.0274	1.02092	2.96536	0.00302328	0.0209274
Sema5b	19.7282	1.77354	0.598078	2.96541	0.00302283	0.0209274
Vps13a	142.341	1.35834	0.458118	2.96505	0.00302631	0.0209389
Lsm3	4151.24	-1.40458	0.473752	-2.9648	0.00302879	0.0209465
Fbxo11	436.311	1.14747	0.38708	2.96443	0.00303246	0.0209528
Fgd5	33.6253	2.13708	0.721492	2.96202	0.00305627	0.0211077
Pip5k1c	922.805	1.07854	0.36416	2.96173	0.00305916	0.0211181
H2-Eb1	3493.65	-1.38099	0.466306	-2.96155	0.00306091	0.0211206
Adamts1	399.909	1.57811	0.533054	2.96051	0.00307131	0.0211731
Inf2	461.727	1.45816	0.492586	2.96021	0.00307426	0.0211838
Gm8186	609.644	-1.40313	0.474052	-2.95986	0.00307777	0.0211984
Rc3h1	216.443	1.37411	0.464383	2.95901	0.00308628	0.0212458
Rps12-ps9	15.6659	-2.13324	0.720959	-2.95889	0.00308746	0.0212458
Arhgef7	498.78	1.23877	0.418723	2.95846	0.00309178	0.021266
Zeb1	30.954	1.80035	0.608596	2.9582	0.0030944	0.0212743
Epb41l1	172.428	1.3571	0.458792	2.95797	0.00309669	0.0212784
Cib2	116.55	-1.44232	0.487621	-2.95786	0.00309779	0.0212784
Mthfsl	68.9797	-1.62502	0.549462	-2.95748	0.00310163	0.0212951
Gucy2f	13.3195	2.27403	0.768983	2.95719	0.00310455	0.0213056
Mlkl	1215.35	-1.15417	0.39035	-2.95674	0.00310908	0.0213078
BC028528	114.699	-1.47189	0.4978	-2.95678	0.00310869	0.0213078
Pcdh19	19.3161	2.16539	0.732293	2.957	0.0031065	0.0213078
Acly	3953.35	1.11692	0.377806	2.95634	0.00311312	0.0213228
Rnf135	325.652	-1.01647	0.344018	-2.95471	0.00312966	0.0214006
Mink1	554.57	1.47227	0.498241	2.95493	0.00312735	0.0214006
Psmg4	1239.71	-1.54898	0.524224	-2.95481	0.00312863	0.0214006
Phactr4	176.848	1.52791	0.517162	2.95442	0.00313259	0.021411
9130008F23Rik	98.4059	-1.27689	0.432233	-2.95417	0.00313508	0.0214184
Gm15500	1745.94	-1.30298	0.441175	-2.95343	0.0031426	0.0214601
Rnf20	530.172	1.10223	0.373281	2.95281	0.00314892	0.0214906
Cenpu	128.048	-1.09291	0.370138	-2.95272	0.0031499	0.0214906
Xpo6	686.131	1.53206	0.519035	2.95175	0.00315979	0.0215484
Rpsa-ps1	24.6939	-1.4417	0.48846	-2.95152	0.0031621	0.0215545
Pbx1	142.073	1.3254	0.449418	2.94915	0.00318652	0.0217015
Rora	177.106	1.24684	0.422815	2.94891	0.00318899	0.0217085
Sec13	5861.2	-1.0421	0.353431	-2.94853	0.00319285	0.0217162
Tbc1d9b	1251.06	1.34576	0.456418	2.94852	0.00319297	0.0217162
Spata24	75.035	-1.15693	0.392494	-2.94764	0.00320206	0.0217488
Ppp1r12b	82.2669	1.83009	0.62086	2.94767	0.0032018	0.0217488
2210408F21Rik	368.73	-1.28991	0.437703	-2.947	0.00320873	0.0217844
Rpl32l	42.7447	-1.51149	0.51298	-2.94648	0.00321409	0.0218083
Phc1	316.194	1.29132	0.438296	2.94623	0.00321674	0.0218095
Parvb	1774.44	1.47069	0.499423	2.94477	0.00323192	0.0218832
Rfx3	96.8965	1.16595	0.396259	2.9424	0.00325678	0.0220318
Lat2	154.242	-1.75828	0.597621	-2.94214	0.00325955	0.0220408
Myo1c	1114.29	1.18965	0.404395	2.94181	0.00326303	0.0220484
mt-Co2	95.2359	1.54265	0.524396	2.94175	0.00326358	0.0220484
C530044C16Rik	8.82056	-2.77503	0.943576	-2.94098	0.0032718	0.0220941
Fer1l5	12.8906	3.13739	1.06706	2.94021	0.00327989	0.0221389
Cd109	789.865	1.49756	0.509404	2.93984	0.00328385	0.0221558
Rpl22l1	1710.6	-1.24793	0.424819	-2.93755	0.0033082	0.0222904
Gm4977	32.8581	-1.20768	0.411502	-2.93482	0.00333745	0.0224675
Hirip3	505.28	1.25994	0.429418	2.93406	0.00334564	0.0225112
Gm45897	20.4912	-1.95813	0.667461	-2.9337	0.00334953	0.0225189
Vps18	639.975	1.00546	0.343017	2.93123	0.00337624	0.0226584
Ppp4r3a	655.398	1.05325	0.359339	2.93108	0.00337782	0.022659
Pfkm	860.362	1.06304	0.362886	2.92939	0.00339624	0.0227625
Zswim9	61.6427	1.43117	0.488634	2.92893	0.00340136	0.0227867
Sh2d6	16.3064	-2.02777	0.692472	-2.92831	0.00340805	0.022814
Slc4a3	100.008	1.17688	0.402059	2.92713	0.00342107	0.0228885
Tpx2	1422.75	1.09227	0.37322	2.9266	0.00342687	0.0229172
Pomc	53.1873	-1.37763	0.470942	-2.92526	0.00344166	0.023006
Slc35c1	315.32	1.54646	0.528772	2.92464	0.00344859	0.0230422
Gm14165	41.3883	-1.4758	0.504678	-2.92425	0.00345292	0.0230433
Jmjd7	20.3473	-1.90105	0.650156	-2.92399	0.00345571	0.0230433
Car4	40.4118	-1.25086	0.427833	-2.9237	0.00345896	0.0230506
Dennd4c	86.2465	1.99439	0.682467	2.92232	0.00347435	0.0231329
Bms1	671.028	1.14182	0.390774	2.92195	0.00347845	0.0231404
Cd274	424.372	-1.80427	0.617635	-2.92126	0.00348615	0.023181
Col8a1	101.636	1.62781	0.557425	2.92022	0.00349782	0.0232484
Psmb1	10090.7	-1.00458	0.344121	-2.91927	0.00350848	0.0232684
Focad	172.209	1.10194	0.377449	2.91944	0.00350665	0.0232684
Znrf3	69.4038	1.60849	0.55098	2.91933	0.00350783	0.0232684
Klrk1	49.8914	-2.08862	0.715733	-2.91815	0.00352116	0.0233313
[truncated: 588 more rows]
