# Supplementary material for: Remodeling of the Tumor Microenvironment Through PAK4 Inhibition Sensitizes Tumors to Immune Checkpoint Blockade
Source: Cancer Res Commun. 2022 Oct 19;2(10):1214–28. doi: 10.1158/2767-9764.CRC-21-0133 (PMC9799984; doi:10.1158/2767-9764.CRC-21-0133)
Supplement: Supplementary Table 6 — Supplemental Table 6: List of extracellular matrix genes enriched in PAK4 KO anti-PD-1 treated samples. [file crc-21-0133-s16.xlsx]

## Sheet: Sheet1
Supplemental table 6: List of extracellular matrix genes enriched in PAK4 KO anti-PD-1 treated samples
Collagen	Cadherin/Protocadherin	Integrin	Adam
Col12a1	Cdh13	Itga1	Adam12
Col14a1	Cdh2	Itga3	Adam17
Col15a1	Cdh5	Itga4	Adam19
Col16a1	Pcdh1	Itga5	Adam9
Col18a1	Pcdh12	Itga6	Adamts1
Col1a1	Pcdh17	Itga7	Adamts12
Col1a2	Pcdh19	Itgav	Adamts2
Col3a1	Pcdh7	Itgb3	Adamts7
Col4a1	Pcdhb9		Adamts9
Col4a2	Pcdhgb2
Col4a3bp	Pcdhgc3
Col4a4
Col4a5
Col5a1
Col5a2
Col5a3
Col6a1
Col6a2
Col6a3
Col8a1
